1 **Title: Semaphorin4D induces inhibitory synapse formation by rapid**  
2 **stabilization of presynaptic boutons via MET co-activation**

3

4 **Abbreviated title:** Sema4D induces inhibitory bouton stabilization via MET

5

6 **Authors:** Cátia P. Frias<sup>1</sup>, Tom Bresser<sup>1</sup>, Lisa Scheefhals<sup>1</sup>, Hai Yin Hu<sup>1</sup>, Paul M. P. van  
7 Bergen en Henegouwen<sup>1</sup>, Casper C. Hoogenraad<sup>1</sup> and Corette J. Wierenga<sup>1\*</sup>

8

9 **Affiliation:** <sup>1</sup>Cell Biology, Department of Biology, Faculty of Science, Utrecht University,  
10 3584 CH Utrecht, the Netherlands

11

12 **\*Corresponding author:**

13 Corette J. Wierenga

14 Utrecht University

15 Department of Biology, Faculty of Science

16 Padualaan 8, 3584CH Utrecht

17 The Netherlands

18 E-mail: [c.j.wierenga@uu.nl](mailto:c.j.wierenga@uu.nl)

19 Tel. +31-30-253 2659

20

21

22 Number of pages: 28  
23 Number of figures: 9  
24 Number of tables: 0  
25 Number of words in the abstract: 238 (max 250)  
26 Number of words in the introduction: 605 (max 650)  
27 Number of words in the discussion: 1492 (max 1500)

28

29

30 **Acknowledgements:**

31 We would like to thank G. Szábo for kindly providing the GAD65-GFP mice, R. van Dorland  
32 for technical support, M. van Kesteren for analysis of LatB immunodata, S. Paradis for  
33 helpful comments and scientific discussions and A. Akhmanova, G.G. Turrigiano and R.J.  
34 Pasterkamp for critically reading the manuscript. This work was supported by the People  
35 Programme (Marie Curie Actions) of the European Union's Seventh Framework Programme  
36 FP7/2007-2013/ under REA grant agreement 289581 (C.P.F.), a Marie Curie Reintegration  
37 Grant 256284 (C.J.W.) and the Netherlands Organization for Scientific Research (NWO-  
38 VIDI, C.J.W., NWO-VICI, C.C.H.).

39

40

41 **Conflict of Interest:**

42 The authors declare no competing financial interests.

## 43 **ABSTRACT**

44 Changes in inhibitory connections are essential for experience-dependent circuit adaptations.  
45 Defects in inhibitory synapses are linked to neurodevelopmental disorders, but the molecular  
46 processes underlying inhibitory synapse formation are not well understood. Here we use high  
47 resolution two-photon microscopy in organotypic hippocampal slices to examine the signaling  
48 pathways induced by the postsynaptic signaling molecule Semaphorin4D (Sema4D) during  
49 inhibitory synapse formation. By monitoring changes in individual GFP-labeled presynaptic  
50 boutons we found that the primary action of Sema4D is to induce stabilization of presynaptic  
51 boutons within tens of minutes. Stabilizing boutons rapidly recruited synaptic vesicles, which  
52 was followed by accumulation of postsynaptic gephyrin. Newly formed inhibitory synapses  
53 were complete and functional after 24 hours, as determined by electrophysiology and  
54 immunohistochemistry. We further showed that Sema4D signaling is regulated by network  
55 activity and can induce a local increase in bouton density, suggesting a possible role in circuit  
56 adaptation. We further examined the intracellular signaling cascade triggered by Sema4D and  
57 found that bouton stabilization occurred through rapid remodeling of actin, and this could be  
58 mimicked by the actin-depolymerizing drug Latrunculin B or by reducing ROCK activity.  
59 The intracellular signaling cascade required activation of the receptor tyrosine kinase MET,  
60 which is a well-known autism risk factor. Our immunohistochemistry data suggests that MET  
61 may be localized to presynaptic inhibitory axons. Together, our data yield important insights  
62 in the molecular pathway underlying activity-dependent Sema4D-induced synapse formation  
63 and reveal a novel role for MET in inhibitory synapses.

64

65

## 66 **Significance Statement**

67 GABAergic synapses provide the main inhibitory control of neuronal activity in the brain. We  
68 make important steps in unraveling the molecular processes that take place when formation of  
69 inhibitory synapses is triggered by a specific signaling molecule, Sema4D. We find that this  
70 process depends on network activity and involves specific remodeling of the intracellular  
71 actin cytoskeleton. We also reveal a previously unknown role for MET in inhibitory synapses.  
72 As defects in GABAergic synapses have been implied in many brain disorders, and mutations  
73 in MET are strong risk factors for autism, our findings urge for a further investigation of the  
74 role of MET at inhibitory synapses.

75

## 76 INTRODUCTION

77

78 GABAergic synapses provide the main inhibitory control over neuronal activity in the brain  
79 and are indispensable for shaping network function (Isaacson and Scanziani, 2011). In  
80 postnatal brain tissue, in which the majority of inhibitory connections have been established,  
81 synapse formation and disassembly is still ongoing (Caroni et al., 2012). Formation and  
82 disassembly of inhibitory synapses in the brain play an important role in experience-  
83 dependent circuit adaptation (Hensch, 2005; Keck et al., 2011; Chen et al., 2015; Froemke,  
84 2015; Sprekeler, 2017) and defects in GABAergic synapses have been observed in many  
85 neurodevelopmental disorders (Marín, 2012; Cellot and Cherubini, 2014; Nelson and Valakh,  
86 2015). We and others have previously shown that inhibitory axons are dynamic structures  
87 with boutons forming and disappearing with apparently stochastic dynamics (Fu and Huang,  
88 2010; Dobie and Craig, 2011; Kuriu et al., 2012; Frias and Wierenga, 2013). These ongoing  
89 bouton dynamics allow quick updating of connections in response to changes in the neuronal  
90 circuitry (Staras, 2007; Frias and Wierenga, 2013). New inhibitory synapses form by the  
91 emergence of new presynaptic boutons at pre-existing axon-dendrite crossings (Wierenga et  
92 al., 2008; Schuemann et al., 2013). However, the signaling pathways that regulate the multiple  
93 steps during inhibitory synapse formation are not well understood (Wierenga, 2017).

94 In the recent years, enormous progress has been made by the identification and  
95 characterization of proteins that are involved in the formation of inhibitory synapses (Siddiqui  
96 and Craig, 2011; Krueger-Burg et al., 2017; Lu et al., 2017). The class 4 semaphorin Sema4D,  
97 originally identified as an axon guidance factor (Kolodkin et al., 1993; Pasterkamp, 2012), has  
98 been shown to play a crucial role in this process. Formation of GABAergic synapses was  
99 shown to depend on Sema4D signaling, as knockdown of postsynaptic Sema4D led to a 30%  
100 reduction of GABAergic synapses in primary cultures (Paradis et al., 2007). In addition, acute  
101 activation of Sema4D pathway by adding a soluble form of the extracellular part of Sema4D  
102 to primary hippocampal cultures induces rapid increase of GABAergic synapses (Kuzirian et  
103 al., 2013; Raissi et al., 2013). The observation that somatic and dendritic synapses responded  
104 equally to Sema4D signaling (Kuzirian et al., 2013) suggests that Sema4D could be acting on  
105 a broad range of (or perhaps all) inhibitory synapses.

106 Despite its well-characterized physiological importance, relatively little is known about the  
107 cellular mechanism by which Sema4D induces inhibitory synapse formation. It was shown  
108 that Sema4D acts as a postsynaptic protein and requires its receptor PlexinB1 to induce

109 inhibitory synapses (Kuzirian et al., 2013; Raissi et al., 2013). The signal cascades that are  
110 triggered by Semaphorin4D-PlexinB1 interaction have been well studied in other cells and these  
111 studies revealed that Semaphorin4D action is highly cell-specific (Zhou et al., 2008; Cagnoni and  
112 Tamagnone, 2014). For instance, Semaphorin4D has been reported to either suppress or enhance  
113 cellular adhesion and/or migration, depending on the cell type (Oinuma et al., 2006; Basile et  
114 al., 2007; Giacobini et al., 2008; Swiercz et al., 2008). The intracellular molecular events  
115 downstream of Semaphorin4D/PlexinB1 signaling that lead to inhibitory synapse induction are  
116 currently not known.

117 In the current study, we used high resolution two-photon microscopy in organotypic  
118 hippocampal slices to characterize Semaphorin4D regulation of inhibitory synapse formation in  
119 intact tissue and to examine the underlying molecular pathway. We found that Semaphorin4D  
120 signaling specifically regulates the rapid stabilization of inhibitory boutons along the axon  
121 and that local bouton stabilization by Semaphorin4D can result in local changes in bouton density  
122 within tens of minutes. These rapid presynaptic changes are followed by subsequent  
123 recruitment of pre- and postsynaptic proteins to complete the formation of functional  
124 inhibitory synapses over the course of the next hours. We also found that Semaphorin4D-induced  
125 bouton stabilization is activity-dependent. The intracellular pathway for bouton stabilization  
126 involves specific remodeling of the actin cytoskeleton, and requires the activation of the  
127 receptor tyrosine kinase MET. Our data unravel an important regulatory pathway of activity-  
128 dependent inhibitory synapse formation and reveal a novel role for the receptor tyrosine  
129 kinase MET in Semaphorin4D-induced formation of inhibitory synapses.

## 130 **EXPERIMENTAL PROCEDURES**

131

### 132 **Animals**

133 All animal experiments were performed in compliance with the guidelines for the welfare of  
134 experimental animals issued by the Federal Government of The Netherlands. All animal  
135 experiments were approved by the Animal Ethical Review Committee (DEC) of Utrecht  
136 University.

137

### 138 **Hippocampal slice cultures**

139 Hippocampal slice cultures (400  $\mu\text{m}$  thick) were prepared from postnatal day 5-7 of both male  
140 and female GAD65-GFP mice (López-Bendito et al., 2004) as previously described (Müllner  
141 et al., 2015). In short, the hippocampi were dissected in ice-cold HEPES-GBSS (containing  
142 1.5 mM  $\text{CaCl}_2 \cdot 2\text{H}_2\text{O}$ , 0.2 mM  $\text{KH}_2\text{PO}_4$ , 0.3 mM  $\text{MgSO}_4 \cdot 7\text{H}_2\text{O}$ , 5 mM KCl, 1 mM  
143  $\text{MgCl}_2 \cdot 6\text{H}_2\text{O}$ , 137 mM NaCl, 0.85 mM  $\text{Na}_2\text{HPO}_4$  and 12.5 mM HEPES) supplemented with 1  
144 mM kynurenic acid and 25 mM glucose, and plated in a MEM-based medium (MEM  
145 supplemented with 25 % HBSS, 25 % horse serum, 30 mM glucose and 12.5 mM HEPES).

146 In GAD65-GFP mice, approximately 20% of the CA1 interneurons express GFP from early  
147 embryonic developmental stage into adulthood (López-Bendito et al., 2004; Wierenga et al.,  
148 2010). The majority of GFP-labeled interneurons expresses reelin and VIP, while  
149 parvalbumin and somatostatin expression is nearly absent (Wierenga et al., 2010). For our  
150 study, the relatively low number of GFP-positive axons is crucial for proper analysis of  
151 individual boutons.

152 The slices were kept in culture for at least one week before the experiments (range 7-21 days  
153 *in vitro*) at 35 °C in 5 %  $\text{CO}_2$ . For live imaging experiments, slices were transferred to an  
154 imaging chamber, where they were continuously perfused with carbogenated artificial  
155 cerebrospinal fluid (ACSF; containing 126 mM NaCl, 3 mM KCl, 2.5 mM  $\text{CaCl}_2$ , 1.3 mM  
156  $\text{MgCl}_2$ , 1.25 mM  $\text{NaH}_2\text{PO}_4$ , 26 mM  $\text{NaHCO}_3$ , 20 mM glucose and 1mM Trolox). The  
157 temperature of the chamber was maintained at 37°C. Treatment and control experiments were  
158 conducted in slices from sister cultures.

159

### 160 **Pharmacological treatments**

161 The following drugs were used: 0.1/0.2 % DMSO, 1 nM Fc and Sema4D-Fc (amino acids 24-  
162 711) (both R&D Systems), 100 nM Latrunculin B (Santa Cruz Biotechnology), 200 nM

163 Jaspalakinolide (Tocris Bioscience), 1  $\mu$ M PHA-665752 (Sigma-Aldrich) and 10  $\mu$ M Y-27632  
164 (Sigma-Aldrich). We used the small molecule PHA-665752 (PHA), a highly specific MET  
165 inhibitor (Christensen et al., 2003; Deguchi et al., 2016), to decrease endogenous  
166 phosphorylation of MET, without affecting MET expression or neuronal cell viability. We  
167 used 10 nM Fc or Sema4D for the local puffing experiments.  
168 For treatments that were followed by immunostaining of inhibitory synapses, 1 nM Fc or  
169 Sema4D-Fc was added to the culturing medium and slices were left in the incubator for 2, 6  
170 or 24 h before fixation.

171

## 172 **Two-photon imaging**

173 For acute treatments, drugs were added to the perfusion ACSF after a baseline period of 40  
174 minutes (5 time points) and we continued imaging for an additional 10 time points in the  
175 wash-in period (total imaging period is 140 minutes). In longer treatments, we treated the  
176 slices for 6 hours after the baseline period (5 imaging time points) at the microscope and  
177 restarted imaging for 5 time points, for a total treatment period of 6 hours and 40 minutes  
178 (400 minutes). For activity blockade, 0.5  $\mu$ M tetrodotoxin citrate (TTX; Tocris Bioscience)  
179 was added to the perfusion ACSF prior to the transfer of the slice to the imaging chamber.  
180 Time-lapse two-photon microscopy images were acquired on a Femtonics 2D two-photon  
181 laser-scanning microscope (Budapest, Hungary), with a Nikon CFI Apochromat 60X NIR  
182 water-immersion objective. GFP was excited using a laser beam tuned to 910 nm (Mai Tai  
183 HP, Spectra Physics). The 3D images (93.5  $\mu$ m x 93.5  $\mu$ m in xy, 1124 x 1124 pixels)  
184 consisted of 29-33 z stacks (0.5  $\mu$ m step size in z). Small misalignments due to drift were  
185 manually compensated during the acquisition.

186 For the local treatment, we used HEPES-ACSF (containing 126 mM NaCl, 3 mM KCl, 2.5  
187 mM CaCl<sub>2</sub>, 1.3 mM MgCl<sub>2</sub>, 1.25 mM NaH<sub>2</sub>PO<sub>4</sub>, 20 mM glucose, and 10 mM HEPES; pH  
188 7.41) with 20  $\mu$ M Alexa 568 (Invitrogen), in order to visualize the spread of the local puff.  
189 Sema4D or Fc was added to the HEPES-ACSF to a final concentration of 10 nM. The  
190 solution was loaded into a patch pipette (4-6 M $\Omega$ ), and was locally applied to a GFP-  
191 labeled axon using a Picospritzer II (General Valve). Time-lapse two photon microscopy  
192 imaging was performed as described previously, except that a second laser (Spectra Physics)  
193 was used at 840 nm to visualize the area of the puff. The 3D images (51.3  $\mu$ m x 51.3  $\mu$ m in  
194 xy, 620 x 620 pixels) consisted of 18-22 z stacks (0.5  $\mu$ m step size in z). After a baseline  
195 period of 20 minutes (5 TPs), the pipette was put into position before the stimulation. The  
196 stimulation consisted of 300 puffs of 20-50 ms at 2 Hz. The pipette was carefully retracted

197 before continuing the time series for 10 additional time points (total imaging period of 70  
198 minutes).

199

## 200 **Two-photon image analysis**

201 The analysis of inhibitory bouton dynamics was performed semi-automatically using ImageJ  
202 (US National Institute of Health) and Matlab-based software (Mathworks). The 3D  
203 coordinates of individual axons were selected at every time point by using the CellCounter  
204 plugin (Kurt De Vos, University of Sheffield, Academic Neurology). For each image, 1-5  
205 stretches of axons (average length 78  $\mu\text{m}$  with standard deviation 18  $\mu\text{m}$ , with average of 31  
206 boutons per axon with standard deviation 11; for local treatment experiments, average length  
207 39  $\mu\text{m}$  with standard deviation 8  $\mu\text{m}$ , with average of 14 boutons per axon with standard  
208 deviation of 4) were selected for analysis.

209 A 3D intensity profile along the selected axons was constructed at each time point, and  
210 individual boutons were identified in a two-step process using custom-made Matlab software  
211 (Schuemann et al., 2013). In brief, an axon threshold was calculated to differentiate the axon  
212 from the background (2 standard deviations above mean intensity); subsequently, a local  
213 threshold (0.5 standard deviation above mean axon intensity) identified the boutons along the  
214 selected axon. Only boutons with at least 5 pixels above bouton threshold were included.  
215 Each image stack was visually examined, and false positives and negatives were corrected  
216 manually. Only raw data was analyzed; images were median-filtered for illustration purposes  
217 only.

218 Boutons were classified as persistent when they were present during all time points, and non-  
219 persistent when they were absent during one or more time points during the imaging session.  
220 The average fraction of persistent and non-persistent boutons was calculated by normalization  
221 to the average number of boutons per axon. To bias our analysis towards synaptic events  
222 (Schuemann et al., 2013), we restricted our analysis to boutons that appeared for at least 2  
223 time points at the same location during the imaging period. We verified that our main  
224 conclusions did not change when this restriction was released. Based on their presence during  
225 baseline and treatment periods, we defined five subgroups of non-persistent boutons: new  
226 boutons (not present during baseline), lost boutons (not present during wash-in), stabilizing  
227 boutons (non-persistent during baseline, persistent during wash-in), destabilizing boutons  
228 (persistent during baseline, non-persistent during wash-in), and transient boutons (non-  
229 persistent in baseline and wash-in) (Fig. 1). Average fraction of each subgroup of boutons was  
230 normalized to the total average number of non-persistent (NP) boutons per axon. The duration



231 of each bouton was defined as the number of time points present divided by the total number  
232 of time points per period. Bouton density was calculated as the average number of boutons at  
233 all time points divided by the 3D axon length.

234

### 235 **Electrophysiology**

236 During the experiment, the slice was placed in a recording chamber perfused with oxygenated  
237 artificial cerebral spinal fluid (ACSF) at a rate of 1 ml/min. The recording ACSF consisted of  
238 126 mM NaCl, 3 mM KCl, 2.5 mM CaCl<sub>2</sub>, 1.3 mM MgCl<sub>2</sub>, 1.25 mM Na<sub>2</sub>H<sub>2</sub>PO<sub>4</sub>, 26 mM  
239 NaHCO<sub>3</sub>, and 20 mM glucose. Whole cell voltage clamp recordings were performed at 35 °C  
240 in CA1 cells of GAD65-GFP slice cultures at DIV 13-19. Recordings were made on a  
241 Multiclamp 700B amplifier (Molecular Devices) and stored using pClamp 10 software. To  
242 isolate sIPSCs, 20 μM DNQX and 50 μM APV were added to the recording ACSF. For  
243 mIPSCs, 0.5 μM TTX was added as well. Thick walled borosilicate pipettes of 3-6 MΩ were  
244 filled with an internal solution containing 70 mM K-gluconate, 70 mM KCl, 0.5 mM EGTA,  
245 10 mM HEPES, 4 mM MgATP, 0.4 mM NaGTP, and 4 mM Na<sub>2</sub>Phosphocreatine. Cells were  
246 excluded from analysis if the series resistance increased more than 35 %. IPSCs were  
247 automatically detected in Clampfit and further analyzed in custom Matlab scripts. Detected  
248 events within 3 ms of each other were merged and events smaller than 3 times the RMS of the  
249 signal were excluded. The cumulative distributions for individual experiments were  
250 interpolated to generate the average distribution.

251

### 252 **Immunohistochemistry, confocal imaging and image analysis**

253 For *post hoc* immunohistochemistry, organotypic hippocampal slices were fixed in 4 % (w/v)  
254 paraformaldehyde for 30 minutes at room temperature. Slices were rinsed in phosphate buffer  
255 and permeabilized with 0.5 % TritonX-100 in phosphate buffer for 15 minutes. Slices were  
256 blocked with 0.2 % TritonX-100, 10 % goat serum (ab7481, Abcam) in phosphate buffer for  
257 60 minutes. Primary antibodies were applied overnight at 4°C in blocking solution. After  
258 washing, slices were incubated with secondary antibodies in blocking solution for 4h at room  
259 temperature. Slices were washed and mounted on slides in Vectashield mounting medium  
260 (Vector Labs).

261 The following primary and secondary antibodies were used: rabbit α-VGAT (1:1000;  
262 Synaptic Systems, 131 003), mouse α-gephyrin (1:1000; Synaptic Systems, 147 011), guinea  
263 pig α-VGLUT (1:400; Millipore, AB5905), rabbit α-Homer (1:1000; Synaptic Systems, 160  
264 002), mouse α-myc (1:100; Oncogene Research Products, OP10), mouse α-MET (1:500;



265 Santa Cruz Biotechnology, sc-8057), Alexa405-, Alexa-488 and Alexa-568 conjugated  
266 secondary antibodies (Invitrogen). For staining MET we used a previously described myc-  
267 tagged nanobody, which was shown to recognize MET with low nanomolar affinity (Heukers  
268 et al., 2014). We visualized the nanobody with an antibody against the C-terminal myc tag.  
269 We validated the nanobody staining in primary hippocampal cultures using a previously  
270 described immunostaining protocol (Esteves da Silva et al., 2015).

271 For immunostainings, high resolution confocal laser scanning microscopy was performed on a  
272 Zeiss LSM-700 system with a Plan-Apochromat 63x 1.4 NA oil immersion objective. Each  
273 image was a z-series of 11-35 images (0.3  $\mu\text{m}$  z step size), each averaged 4 times. The  
274 imaging area in the CA1 region was 78 x 78  $\mu\text{m}$  (1024 x 1024 pixels). The confocal settings  
275 were kept the same to compare fluorescence intensities between slices.

276 For the quantification of VGAT and gephyrin intensities per image, we determined per image  
277 the mean intensity of 3 randomly chosen areas of 10 x 10  $\mu\text{m}$  of the average projection image  
278 from the 5 middle z-layers. For the cumulative plots individual values (per area) were used.  
279 Synaptic puncta size and number were determined using the PunctaAnalyzer plugin, and  
280 inhibitory synapses were defined as overlapping VGAT and gephyrin puncta. For determining  
281 co-localization of GFP-labeled boutons with synaptic marker VGAT or with MET, we  
282 manually inspected individual boutons through all z-sections. A bouton was only considered  
283 positive when at least one z stack of the bouton overlapped with VGAT or MET staining. The  
284 images were median-filtered only for illustration purposes.

285

## 286 **Statistical Analysis**

287 Data are represented as mean values  $\pm$  standard error of the mean, unless stated otherwise.  
288 Statistical analysis was performed using GraphPad Prism software. Results from treatment  
289 and control experiments were compared using the Mann-Whitney U test (MW). The Chi-  
290 Square test ( $\chi^2$ ) was used for comparing the fraction of axons with/without stabilizing  
291 boutons. For comparing multiple groups, we used the Kruskal-Wallis test (KW) followed by a  
292 posthoc Dunn's comparison test. We used a One-Way ANOVA followed by a Dunnett's  
293 multiple comparison test (One-Way ANOVA) to compare the effect of wash-in of PHA over  
294 time. We used a Two-Way ANOVA followed by a Sidak's multiple comparisons test (Two-  
295 Way ANOVA) to compare treatment effects at multiple time points. For the comparison of  
296 cumulative distributions, we used the Kolmogorov-Smirnov (KS) test. We have indicated the  
297 tests and p-values in the figure legends. Differences between control and treatment were  
298 considered significant when  $p < 0.05$  (\*,  $p < 0.05$ ; \*\*,  $p < 0.01$ ; \*\*\*,  $p < 0.001$ ). In all figure

299 legends and text, N indicates the number of independent experiments, and n indicates the  
300 number of axons/images analyzed.

## 301 **RESULTS**

302

303 We performed time-lapse two-photon microscopy in organotypic hippocampal cultures from  
304 GAD65-GFP mice to monitor the dynamics of inhibitory boutons in the CA1 region of the  
305 hippocampus (Wierenga et al., 2008; Schuemann et al., 2013). In GAD65-GFP mice,  
306 approximately 20% of the CA1 interneurons express GFP. The majority of GFP-labeled  
307 interneurons express reelin and VIP, while parvalbumin and somatostatin expression is nearly  
308 absent (López-Bendito et al., 2004; Wierenga et al., 2010). High-resolution image stacks of  
309 GFP-labeled inhibitory axons were acquired every 10 minutes, for a total period of 150  
310 minutes (15 time points). Inhibitory boutons were remarkably dynamic and many boutons  
311 appear, disappeared and reappeared during the course of the imaging period. To bias our  
312 analysis towards synaptic events, we only included boutons that appeared for at least 2 time  
313 points at the same location during the imaging period. We distinguished two main classes of  
314 boutons: persistent boutons, which were present during all time points, and non-persistent  
315 boutons, which were absent during one or more time points during the imaging session (Fig.  
316 1A,B). Approximately 77 % (with standard deviation of 12 %) of inhibitory boutons at any  
317 given time point were persistent (Fig. 1C), and they reflect inhibitory synapses (Wierenga et  
318 al., 2008; Müllner et al., 2015). Non-persistent boutons reflect locations where inhibitory  
319 synapses are ‘in transition’, e.g. where synapses are being formed or disassembled (Wierenga  
320 et al., 2008; Dobie and Craig, 2011; Fu et al., 2012; Schuemann et al., 2013). Based on the  
321 presence or absence of non-persistent boutons during a baseline and wash-in period (details  
322 are given in the methods section), we distinguished 5 subgroups of non-persistent boutons:  
323 new (N; absent during baseline), lost (L; absent during wash-in), stabilizing (S; non-persistent  
324 during baseline, persistent during wash-in), destabilizing (D; persistent during baseline, non-  
325 persistent during wash-in) and transient (non-persistent in both periods). These different  
326 subgroups of non-persistent boutons not only differed in their incidence and duration (Fig.  
327 1C,D), but also in their molecular composition, as assessed by immunostaining for the  
328 presynaptic vesicular GABA transporter (VGAT) and the postsynaptic scaffold gephyrin (Fig.  
329 1E). Stabilizing boutons, which were present for at least 90 minutes before fixation, showed  
330 similar association with VGAT and gephyrin as persistent boutons, indicating that they are  
331 nascent inhibitory synapses that have started to recruit pre- and postsynaptic proteins within  
332 this period. Newly formed boutons, which were present for a short period before fixation,  
333 showed a lower percentage of VGAT and gephyrin association. Boutons with longer total

334 lifetime before fixation showed higher association with VGAT and gephyrin, suggesting a  
335 gradual recruitment of proteins over the imaging period (Fig. 1F). Recruitment of gephyrin  
336 appeared delayed compared to VGAT, as previously reported (Wierenga et al., 2008; Dobie  
337 and Craig, 2011). These data demonstrate that inhibitory presynaptic boutons are dynamic  
338 structures that are continuously being formed and disassembled along the axons, and suggest  
339 that non-persistent boutons reflect boutons at different stages of inhibitory synapse assembly  
340 and disassembly.

341

### 342 **Inhibitory bouton stabilization during treatment with Sema4D**

343 It was recently shown that class 4 semaphorin Sema4D can rapidly induce an increase of  
344 functional inhibitory synapses in hippocampal dissociated cultures (Kuzirian et al., 2013).  
345 However, these data could not resolve if Sema4D directly promotes synapse formation or  
346 rather prevents ongoing synapse elimination, thereby indirectly increasing synaptic density.  
347 To examine the effect of Sema4D on ongoing inhibitory bouton dynamics, we bath applied  
348 the extracellular domain of mouse Sema4D conjugated to the Fc region of mouse IgG2A  
349 (Sema4D; 1 nM) and compared inhibitory bouton dynamics during a baseline period of 5 time  
350 points and during Sema4D treatment in the subsequent 10 time points (Fig. 2A). We used Fc  
351 alone (1 nM) as a control treatment (Kuzirian et al., 2013). Bath application of Sema4D did  
352 not affect overall axonal morphology (Fig. 2A) and did not change the density of inhibitory  
353 boutons (Fig. 2B). However, when we analyzed the different subgroups of non-persistent  
354 boutons, we found that Sema4D treatment specifically enhanced the fraction of stabilizing  
355 boutons from  $6 \pm 2\%$  to  $16 \pm 3\%$  (Fig. 2C). Indeed, this effect was also clear when we  
356 analyzed the absolute density of boutons. The density of stabilizing boutons was increased by  
357  $>2$ -fold, while other subgroups of boutons were unaffected (Fig. 2D-H). To examine how  
358 Sema4D-induced stabilization developed over time, we quantified the number of boutons that  
359 were present for 5 consecutive time points during the baseline and the wash-in period. We  
360 found that Sema4D induced a marked increase in these boutons over the course of the wash-in  
361 period (% stabilization, Fig. 2I), and strongly enhanced the number of boutons that had  
362 stabilized at the end of this period (last 5 time points; Fig. 2J). Stabilizing boutons are  
363 relatively rare in our slices, as under control conditions only 40% of the axons display one or  
364 more stabilizing boutons. Treatment with Sema4D significantly increased this fraction to 77%  
365 (Fig. 2K). Altogether, these data show that Sema4D treatment in intact tissue specifically  
366 promotes the stabilization of inhibitory boutons within tens of minutes, without affecting  
367 synapse elimination.

368

369 **Sema4D-induced stabilization of inhibitory boutons is the first step of inhibitory synapse**  
370 **formation**

371 We next assessed whether Sema4D-induced bouton stabilization also results in an increase of  
372 inhibitory synapses in our slices. We first examined if longer Sema4D treatment could  
373 enhance the bouton stabilization effect. We compared dynamics of individual boutons during  
374 baseline and after 6 h treatment (400 minutes total treatment) and found that longer Sema4D  
375 treatment also induced prominent bouton stabilization, measured as fraction as well as  
376 absolute density (Fig. 3A,B). However, the 6 h treatment did not increase bouton stabilization  
377 beyond the 2 h level (Fig. 3C), suggesting that only a limited number of inhibitory boutons  
378 can be stabilized by Sema4D treatment, resulting in saturation of the treatment effect already  
379 after 2 hr. In addition to promoting bouton stabilization, with longer treatments we also  
380 detected a small reduction in the fraction of transient boutons (Fig. 3A). This effect was only  
381 revealed by analyzing the changes in density over time (Fig. 3D), which suggest that this may  
382 reflect an indirect effect of prolonged bouton stabilization. These results indicate that the  
383 Sema4D-induced stabilization of inhibitory boutons persists, but does not further increase,  
384 with longer treatments.

385 We next asked if Sema4D-induced inhibitory bouton stabilization leads to the formation of  
386 functional synapses. We treated organotypic hippocampal slices with 1 nM Fc or 1 nM  
387 Sema4D for 24 h, and determined overall inhibitory synapse density by  
388 immunohistochemistry. We used antibodies against presynaptic VGAT and postsynaptic  
389 gephyrin to visualize inhibitory synapses (Fig. 3E,F). Sema4D induced a clear  $24 \pm 7$  %  
390 increase in the density of inhibitory synapses (Fig. 3G), suggesting that the observed  
391 Sema4D-induced bouton stabilization after 2 h resulted in the formation of new synapses after  
392 24 h. We used electrophysiological recordings to verify that these synapses were functional.  
393 In agreement with the immunohistochemistry results, we found that 24 h treatment with  
394 Sema4D increased the frequency of miniature inhibitory postsynaptic currents (mIPSCs) by  
395 37 % (from  $5.2 \pm 0.5$  to  $7.1 \pm 0.5$  Hz), while mIPSC amplitude was not affected (Fig. 3H-K).  
396 To determine the time course of the recruitment of pre- and postsynaptic elements during  
397 synapse formation, we quantified VGAT and gephyrin immunostaining after 2, 6 and 24 h  
398 treatments. Treatment with Sema4D induced an increase in the area of VGAT puncta, without  
399 affecting their density (Fig. 4A-C). For gephyrin, Sema4D treatment caused an increase in  
400 puncta density, but not in their size (Fig. 4D-F). The average puncta intensity was not affected  
401 (at 24 h, VGAT:  $107 \pm 4$  % of control,  $p = 0.35$  (MW); gephyrin:  $106 \pm 5$  % of control,  $p =$

402 0.51 (MW)). Interestingly, the time course for presynaptic and postsynaptic changes was  
403 different. Whereas an increase in presynaptic VGAT area could already be detected after 6 h,  
404 the increase in postsynaptic gephyrin density was only evident after 24 h. These data are  
405 consistent with gradual increase in presynaptic vesicle content and subsequent acquisition of  
406 postsynaptic scaffolds at newly formed inhibitory synapses (Wierenga et al., 2008; Dobie and  
407 Craig, 2011). Together, these data indicate that the initial Semaphorin 4D-induced stabilization of  
408 inhibitory boutons is followed by a slower maturation process, resulting in an overall increase  
409 in functional inhibitory synapses after Semaphorin 4D treatment.

410

### 411 **Semaphorin 4D-induced bouton stabilization relies on network activity**

412 We previously showed that inhibitory bouton dynamics are regulated by neuronal activity  
413 (Schuemann et al., 2013). We therefore asked whether Semaphorin 4D-induced stabilization of  
414 inhibitory boutons depended on network activity. Blocking activity by bath application of  
415 tetrodotoxin (TTX) slightly decreased overall bouton dynamics in our slices (data not shown),  
416 which is in accordance with our previous findings (Schuemann et al., 2013). However, we  
417 found that in the presence of TTX Semaphorin 4D treatment no longer induced stabilization of  
418 inhibitory boutons, and that Semaphorin 4D treatment even led to a reduction in bouton stabilization  
419 compared to control (Fig. 5A,B). Indeed, whereas under control conditions Semaphorin 4D treatment  
420 increased the number of axons that displayed stabilizing boutons, it led to a decrease in the  
421 presence of TTX (Fig. 5C,D). These findings demonstrate that Semaphorin 4D treatment affects  
422 bouton dynamics in an activity-dependent manner, and indicate that Semaphorin 4D promotes the  
423 stabilization of inhibitory presynaptic boutons only in active neuronal networks.

424

### 425 **Local Semaphorin 4D-induced bouton stabilization**

426 Under physiological circumstances, Semaphorin 4D is a membrane-attached protein acting locally  
427 (Pasterkamp, 2012; Raissi et al., 2013). Presynaptic boutons along the same axon interact and  
428 share presynaptic proteins and vesicles (Staras, 2007; Bury and Sabo, 2016) and we wondered  
429 if local Semaphorin 4D signaling would act differently compared to ubiquitous activation of Semaphorin 4D  
430 signaling during bath application. We therefore locally applied Semaphorin 4D to short stretches  
431 (~40  $\mu\text{m}$ ) of inhibitory axons (Fig. 5E). Local application with control solution appeared to  
432 slightly reduce local bouton stabilization (compare control curves in 5F and 2I), possibly from  
433 mechanical pressure. In contrast, local application of Semaphorin 4D induced robust stabilization of  
434 inhibitory boutons in these axons (Fig. 5F), resulting in a significant increase in local bouton  
435 density in these short axon stretches (Fig. 5G). This indicates that local application of

436   Sema4D is more potent to induce axonal changes than bath application, which failed to induce  
437   a change in overall bouton density (compare Fig. 2B). This suggests that stabilizing boutons  
438   may compete for presynaptic components within individual axons when Sema4D is bath  
439   applied, limiting overall bouton density. Together, our results demonstrate that Sema4D-  
440   signaling is capable to mediate rapid changes in local bouton density of inhibitory axons in an  
441   activity-dependent manner.

442

#### 443   **Actin remodeling by low doses of LatrunculinB promotes stabilization of inhibitory** 444   **boutons**

445   The Sema4D effect on inhibitory synapses was previously shown to be dependent on its  
446   receptor PlexinB1 (Kuzirian et al., 2013). Sema4D/PlexinB1 signaling induces changes in the  
447   intracellular actin cytoskeleton via multiple small GTPase signaling pathways in many  
448   different cell types (Zhou et al., 2008; Cagnoni and Tamagnone, 2014). Some of these  
449   downstream signaling pathways, which can modify actin in multiple ways, are mediated by  
450   receptor tyrosine kinases, such as MET and ErbB-2, acting as co-receptors for PlexinB1. It  
451   was shown in breast carcinoma cells that, when MET is co-activated, Sema4D/PlexinB1  
452   signaling reduces RhoA levels and this results in actin depolymerization, while co-activation  
453   of ErbB-2 leads, via RhoA activation, to actin polymerization (Swiercz et al., 2008; Sun et al.,  
454   2012). To examine how the actin cytoskeleton is involved in inhibitory bouton dynamics, we  
455   studied the effect of two actin remodeling drugs in our system with intended opposite effects:  
456   the actin monomer sequestering drug LatrunculinB (LatB), which is generally considered an  
457   actin depolymerizing drug, and the actin filament stabilizer Jasplakinolide (Jasp), which  
458   promotes actin polymerization. In the low concentrations that we use here (100 nM LatB and  
459   200 nM Jasp) these drugs perturb the actin cytoskeleton without affecting synaptic function  
460   (Honkura et al., 2008; Rex et al., 2009). None of the treatments changed overall axon  
461   morphology (Fig. 6A). We found that the fraction of stabilizing boutons was increased in the  
462   presence of LatB, but not in the presence of Jasp (Fig. 6B,C). The effect of LatB seemed  
463   highly specific for stabilizing boutons, as the other bouton subgroups were not affected.  
464   Indeed, we found that LatB specifically increased the absolute density of stabilizing boutons  
465   by almost 2-fold (Fig. 6D) and increased the fraction of axons with stabilizing boutons (Fig.  
466   6E). The rapid and highly specific action of LatB suggests a direct action on the local actin  
467   cytoskeleton. The changes in bouton dynamics after LatB treatment were surprisingly similar  
468   to Sema4D treatment (Fig. 2F and 2K). Our findings suggest that inhibitory bouton dynamics



469 are regulated by specific changes in the actin cytoskeleton and that conditions favoring actin  
470 depolymerization promote bouton stabilization.

471 The similarity between stabilization of inhibitory boutons induced by treatment with LatB or  
472 Semaphorin 4D suggests that both treatments may induce a similar effect on intracellular actin. As  
473 we found that only a specific subset of inhibitory boutons were stabilized by Semaphorin 4D  
474 treatment (Fig. 2C), we wondered if these were the same boutons that responded to LatB. To  
475 test this, we treated slices with a combination of LatB and Fc or LatB and Semaphorin 4D. We found  
476 that bouton stabilization by LatB occluded a further increase by co-application with Semaphorin 4D  
477 (Fig. 6F and 6G), although it did increase the fraction of new boutons. These results suggest  
478 that LatB and Semaphorin 4D treatment act to stabilize a specific, overlapping, subset of inhibitory  
479 boutons.

480 We then wondered if treatment with the actin depolymerizing drug LatB would be sufficient  
481 to induce inhibitory synapse formation, similarly to the Semaphorin 4D treatment. Interestingly, we  
482 observed that although LatB induced changes in VGAT and gephyrin puncta after 2 h (Fig.  
483 7A-F), these changes were not coordinated and did not result in an increase in the density of  
484 inhibitory synapses (Fig. 7G). Gephyrin and VGAT staining returned to baseline with longer  
485 LatB treatment. Together, our data suggest that LatB and Semaphorin 4D induce rapid stabilization  
486 of the same subgroup of inhibitory boutons, but that only Semaphorin 4D signaling leads to  
487 coordinated pre- and postsynaptic changes resulting in inhibitory synapse formation. This  
488 indicates that presynaptic bouton stabilization alone is not enough to induce inhibitory  
489 synapse formation and that additional signaling may be required.

490

#### 491 **Inhibitory bouton stabilization by Semaphorin 4D requires MET**

492 Our observation that LatB could mimic the Semaphorin 4D-induced stabilization of inhibitory  
493 boutons points to a possible involvement of MET in this process. We therefore assessed if  
494 MET activation is necessary for the observed Semaphorin 4D-induced stabilization of boutons by  
495 making use of the highly specific MET inhibitor PHA-665752 (PHA) (Christensen et al.,  
496 2003; Deguchi et al., 2016). We first verified that adding PHA alone did not affect bouton  
497 dynamics (Fig. 8B) or spontaneous inhibitory postsynaptic currents (data not shown),  
498 indicating that MET is not very active under baseline conditions in our slices. Next, we  
499 treated our slices with Semaphorin 4D to induce bouton stabilization and compared bouton dynamics  
500 in the presence or absence of PHA (Fig. 8A, C-D) Blocking MET with PHA completely  
501 abolished the Semaphorin 4D-induced increase in the density of stabilizing boutons (Fig. 8D). In  
502 fact, blocking MET in combination with Semaphorin 4D treatment almost entirely abolished the

503 occurrence of stabilizing boutons on our slices (Fig. 8E), while the other bouton subgroups  
504 were not much affected (8C). Consistent with the live imaging data, inhibiting MET with  
505 PHA also blocked the increase in VGAT staining intensity (Fig. 8F,G) and mIPSC frequency  
506 (Fig. 8H) after Semaphorin 4D treatment. Taken together, these data indicate that activation of MET  
507 is required for the Semaphorin 4D-induced stabilization of inhibitory boutons.

508 As the actin depolymerization pathway downstream of Semaphorin 4D/PlexinB1 signaling via MET  
509 was previously shown to reduce intracellular RhoA activity (Swiercz et al., 2008; Sun et al.,  
510 2012), we tested if stabilization of inhibitory boutons could also be achieved by directly  
511 reducing ROCK activity, a well-known downstream effector of RhoA (Amano et al., 2010).  
512 We found that reducing ROCK signaling with the specific ROCK inhibitor Y-27632 also  
513 resulted in an increase in the density of stabilizing boutons in our slices (Fig. 8I), which was  
514 similar to the effect of LatB and Semaphorin 4D treatments. This suggests that the intracellular  
515 pathway that is activated by Semaphorin 4D/PlexinB1 signaling to induce stabilization of inhibitory  
516 boutons involves activation of MET receptor tyrosine kinase and reduction of ROCK activity  
517 to promote specific changes in the actin cytoskeleton.

518

### 519 **MET is enriched at a subset of inhibitory presynaptic boutons**

520 Our pharmacological experiments do not address if Semaphorin 4D-induced changes in actin occur  
521 at the pre- or postsynaptic compartment. The subcellular localization of Semaphorin 4D and  
522 PlexinB1 is not known (Paradis et al., 2007), but the localization of MET has been described.  
523 Interestingly, it was reported that in postnatal tissue the majority of MET is localized in axons  
524 (Judson et al., 2009) and detailed EM analysis showed clusters of MET in the shaft of  
525 unmyelinated axons and in small presynaptic terminals (Eagleson et al., 2013). The majority  
526 of these terminals are glutamatergic (Tyndall and Walikonis, 2006; Xie et al., 2016), but  
527 possible MET expression in GABAergic axons was never addressed directly. To address the  
528 localization of MET in our slices, we made use of an antibody (Qiu et al., 2014) and a  
529 nanobody (Heukers et al., 2014) with demonstrated specificity for MET. We first confirmed  
530 that both label synapses in primary hippocampal cultures (Fig. 9A-C). The majority of MET  
531 puncta overlapped with excitatory synapses (Fig. 9A,B) in line with previous reports (Tyndall  
532 and Walikonis, 2006; Eagleson et al., 2013; Xie et al., 2016). However, clear association of  
533 MET with inhibitory presynapses was also observed in these cultures (Fig. 9B,C). We then  
534 used the MET nanobody and antibody to label MET in our hippocampal slices of GAD65-  
535 GFP mice (Fig. 9D). Although there was a quantitative difference, presumably reflecting a  
536 difference in labeling affinity, both methods clearly showed that a subset of GFP-labeled

537 inhibitory boutons was enriched for MET (Fig. 9E). Comparison between the MET staining  
538 pattern with staining for postsynaptic gephyrin (compare Figs. 9F and 3F) suggests a  
539 presynaptic localization of MET at these inhibitory synapses, as MET puncta were often  
540 completely embedded in the GFP-labeled bouton. These data suggest that MET may be  
541 present in inhibitory axons and terminals to mediate Sema4D/plexinB1 signaling.  
542

## 543 **DISCUSSION**

544

545 By monitoring individual boutons over time in live brain slices, we observed that the primary  
546 action of Sema4D signaling is to stabilize presynaptic boutons of inhibitory axons within tens  
547 of minutes. These stabilizing boutons develop into mature, functional inhibitory synapses over  
548 the course of several hours. They rapidly acquire presynaptic vesicles as evidenced by an  
549 increase in VGAT staining, while recruitment of postsynaptic gephyrin was slower. We  
550 demonstrate for the first time that Sema4D-induced bouton stabilization is activity-dependent  
551 and that Sema4D signaling can induce local changes in bouton density. We found that  
552 inhibitory axons respond differently to Sema4D signaling in active and inactive networks  
553 (Fig. 5). These results suggest that inhibitory axons can respond very rapidly to local signals  
554 in their environment, but that the response is modulated by the state of the network and/or the  
555 local internal state of the axon. It was previously shown that Sema4D in inhibitory synapses  
556 signals via the PlexinB1 receptor. We now show that this signaling pathway requires co-  
557 activation of the receptor tyrosine kinase MET. The downstream intracellular pathway  
558 involves specific remodeling of the actin cytoskeleton, which can be mimicked by bath  
559 application of low levels of the actin depolymerizing drug LatB or by reducing ROCK  
560 activity. Our immunohistochemistry data suggest that MET is localized to the presynaptic  
561 compartment of GABAergic synapses. Our data is the first to show a role for the autism-  
562 linked MET in inhibitory synapses.

563

564 Our live imaging experiments give unique insight in the dynamics of inhibitory synapse  
565 formation in brain slices, which remain undetected with methods using stationary  
566 comparisons before and after treatment. In our slices, the majority of GFP-labeled boutons are  
567 persistent and display pre- and postsynaptic markers of mature inhibitory synapses, but a  
568 significant portion (~20-25%) of inhibitory boutons are non-persistent and represent locations  
569 where inhibitory synapses are ‘in transition’. At these axonal locations, inhibitory synapses  
570 are formed and disassembled in an apparent trial-and-error fashion (Wierenga et al., 2008;  
571 Dobie and Craig, 2011; Fu et al., 2012; Schuemann et al., 2013; Wierenga, 2017). We found  
572 that Sema4D signaling did not induce formation of inhibitory synapses *de novo*, but  
573 specifically stabilized boutons at locations where a bouton had occurred before. We also  
574 observed that Sema4D-induced bouton stabilization was not further enhanced by longer  
575 treatment (>2 h) or by co-application with LatB, suggesting that the number of boutons

576 susceptible to Semaphorin 4D at any given time is limited. This suggests that Semaphorin 4D signaling is  
577 involved only at a specific stage during synapse formation and that boutons which are more  
578 mature or too immature do not respond to Semaphorin 4D. In primary cultures, a larger fraction of  
579 synapses are immature compared to intact tissue (Dobie and Craig, 2011; Kuriu et al., 2012),  
580 which may explain why the Semaphorin 4D effect on inhibitory synapses is stronger in primary  
581 neurons (Kuzirian et al., 2013). In our slices, Semaphorin 4D treatment increased inhibitory synapse  
582 density by ~20% after 24 hours (Fig. 3G), which is comparable to experience-dependent  
583 changes in inhibitory synapses observed *in vivo* (Keck et al., 2011; Chen et al., 2015; Villa et  
584 al., 2016).

585  
586 One of the key observations of this study is that the primary action of Semaphorin 4D is to stabilize  
587 presynaptic boutons of inhibitory axons within tens of minutes. These stabilizing boutons  
588 develop into mature, functional inhibitory synapses over the course of several hours. It was  
589 previously shown that inhibitory synapses can be induced by postsynaptic gephyrin clustering  
590 (Flores et al., 2015), and rapid formation of new gephyrin clusters was observed after  
591 Semaphorin 4D treatment in primary cultures (Kuzirian et al., 2013), suggesting that Semaphorin 4D may  
592 promote inhibitory synapse formation via a postsynaptic mechanism. However, our data  
593 clearly show that gephyrin clustering after Semaphorin 4D treatment is delayed and that the primary  
594 action of Semaphorin 4D signaling is presynaptic bouton stabilization, arguing against a triggering  
595 mechanism via postsynaptic gephyrin. The increase in VGAT signal reflects recruitment of  
596 synaptic vesicles to newly forming synapses (Dobie and Craig, 2011; Schuemann et al.,  
597 2013). Bouton stabilization and gephyrin clustering were also induced by LatB, but LatB  
598 failed to induce new inhibitory synapses. This suggests that Semaphorin 4D signaling coordinates  
599 pre- and postsynaptic changes at emerging inhibitory synapses. The faster time course for the  
600 increase in postsynaptic gephyrin clusters in primary cultures (Kuzirian et al., 2013) may  
601 reflect an overall difference in neuronal maturation level. In young neurons, new gephyrin  
602 clusters can be rapidly induced by local GABA signaling (Oh et al., 2016), while in mature  
603 neurons prolonged or additional signaling may be required.

604  
605 It was previously shown that Semaphorin 4D acts as a postsynaptic protein and requires PlexinB1 for  
606 promoting inhibitory synapse formation (Kuzirian et al., 2013; Raissi et al., 2013). Our data  
607 shows that this signaling pathway requires co-activation of MET, suggesting that the receptor  
608 tyrosine kinase MET acts as a co-receptor of PlexinB1 (Swiercz et al., 2008). PlexinB1 and  
609 MET receptors can form a complex which, upon Semaphorin 4D stimulation, results in cross-

610 activation of both receptors (Giordano et al., 2002). It is currently not known if the PlexinB1  
611 receptors that mediate the Sema4D signaling are located in the pre-or postsynaptic membrane  
612 and our data does not address this issue directly. However, our immunohistochemistry data  
613 (Fig. 9) suggest that MET receptors are localized in a subset of inhibitory synapses, in  
614 primary hippocampal cultures and organotypic slices. A presynaptic location of MET in  
615 inhibitory boutons suggests retrograde signaling of postsynaptic Sema4D via presynaptic  
616 plexinB1 receptors. Retrograde semaphorin signaling was recently demonstrated in  
617 *Drosophila* neuromuscular junction (Orr et al., 2017). However, cell-specific genetic studies  
618 will be needed to rule out a contribution of Sema4D signaling via postsynaptic receptors in  
619 inhibitory synapse formation.

620

621 Our data indicates that inhibitory bouton stabilization by activation of the Sema4D/PlexinB1  
622 signaling pathway is induced through actin remodeling (Swiercz et al., 2008; Sun et al.,  
623 2012). The induced changes in actin are highly specific and not due to a general decrease in  
624 actin dynamics since Jasplakinolide did not affect inhibitory boutons. Treatment with the actin  
625 depolymerizing drug LatB or the ROCK inhibitor Y-27632 promoted bouton stabilization in a  
626 similar way as Sema4D, presumably by inducing similar changes in presynaptic actin at  
627 stabilizing boutons. Given that actin is abundantly present in all cells, it is surprising that bath  
628 application of LatB specifically promotes stabilization of immature boutons without affecting  
629 other inhibitory boutons. It is important to note that low doses of monomer sequestering  
630 drugs, such as LatB, do not lead to the complete disassembly of actin structures and leave  
631 postsynaptic spines and synaptic transmission intact (Honkura et al., 2008; Rex et al., 2009;  
632 Bleckert et al., 2012). Instead, LatB treatment may result in limited availability of actin  
633 monomers in small cellular compartments, which indirectly affects actin-regulating factors  
634 resulting in structural changes of the actin cytoskeleton (Ganguly et al., 2015; Suarez et al.,  
635 2015). Our data therefore suggest that the actin cytoskeleton at stabilizing boutons is different  
636 from other compartments and specifically sensitive to LatB. However, we stress here that our  
637 experiments cannot distinguish between pre- or postsynaptic effects of LatB, but the rapid  
638 (boutons are stabilized within 10 minutes) and highly specific effect seems to suggest a local  
639 action of LatB. Inhibitory synapses are usually localized directly on the dendritic shaft and not  
640 much is known about a possible role of postsynaptic actin structures at these synapses. Within  
641 axons, several actin-based structures have been described (Leterrier et al., 2017) and  
642 presynaptic actin has been implicated in transmission, plasticity, as well as synapse formation  
643 (Cingolani and Goda, 2008; Chia et al., 2013). In *C. elegans* and *Drosophila* it has been

644 demonstrated that presynaptic actin structures undergo important remodeling during synapse  
645 formation (Chia et al., 2014; Piccioli and Littleton, 2014). It is currently not known which  
646 actin-regulating factors are involved in presynaptic bouton stabilization, but promising  
647 candidates include cortactin (Alicea et al., 2017), cofilin (Piccioli and Littleton, 2014) and  
648 Mical (Orr et al., 2017). Future studies will be necessary to unravel precise actin structures in  
649 mature and immature boutons and the role of actin-regulating factors during synapse  
650 formation.

651

652 Changes in inhibitory synapses play an important role in the rewiring of circuits during  
653 development and in response to behavioral demands during adulthood (Keck et al., 2011;  
654 Chen et al., 2015; Froemke, 2015) and defects in GABAergic synapses are associated with  
655 neurodevelopmental diseases (Hensch, 2004; Marín, 2012). Mutations in the MET gene are an  
656 established risk factor for autism spectrum disorder (ASD), as determined by various human  
657 imaging and genetic studies (Peng et al., 2013). It is a multifunctional receptor involved in  
658 many cellular pathways, and its exact role in ASD is not yet understood (Eagleson et al.,  
659 2017). Previous studies in neurons have implicated MET in regulating postsynaptic strength  
660 in excitatory neurons (Qiu et al., 2014; Lo et al., 2016), excitatory synapse formation (Xie et  
661 al., 2016) and interneuron migration (Martins et al., 2011). Our data demonstrate that  
662 activation of MET is also an essential part of the Sema4D-signaling pathway promoting  
663 activity-dependent inhibitory bouton stabilization, indicating a novel role of MET in the  
664 assembly of inhibitory presynapses.

665

666



## 667 REFERENCES

- 668 Alicea D, Perez M, Maldonado C, Dominicci-Cotto C, Marie X (2017) Cortactin Is a Regulator of Activity-  
669 Dependent Synaptic Plasticity Controlled by Wingless. *J Neurosci* 37:2203–2215 Available at:  
670 <http://www.jneurosci.org/content/jneuro/37/8/2203.full.pdf>.
- 671 Amano M, Nakayama M, Kaibuchi K (2010) Rho-kinase/ROCK: A key regulator of the cytoskeleton and cell  
672 polarity. *Cytoskeleton* 67:545–554 Available at: <http://www.ncbi.nlm.nih.gov/pubmed/20803696>  
673 [Accessed December 4, 2017].
- 674 Basile JR, Holmbeck K, Bugge TH, Gutkind JS (2007) MT1-MMP controls tumor-induced angiogenesis through  
675 the release of semaphorin 4D. *J Biol Chem* 282:6899–6905 Available at:  
676 <http://www.ncbi.nlm.nih.gov/pubmed/17204469> [Accessed August 29, 2013].
- 677 Bleckert A, Photowala H, Alford S (2012) Dual pools of actin at presynaptic terminals. *J Neurophysiol*  
678 107:3479–3492 Available at: <http://jn.physiology.org/cgi/doi/10.1152/jn.00789.2011> [Accessed October  
679 10, 2014].
- 680 Bury LA, Sabo SL (2016) Building a Terminal: Mechanisms of Presynaptic Development in the CNS. *Neurosci*  
681 22:372–391 Available at: <http://www.ncbi.nlm.nih.gov/pubmed/26208860>.
- 682 Cagnoni G, Tamagnone L (2014) Semaphorin receptors meet receptor tyrosine kinases on the way of tumor  
683 progression. *Oncogene* 33:4795–4802 Available at: <http://dx.doi.org/10.1038/onc.2013.474>.
- 684 Caroni P, Donato F, Muller D (2012) Structural plasticity upon learning: regulation and functions. *Nat Rev*  
685 *Neurosci* 13:478–490 Available at: <http://dx.doi.org/10.1038/nrn3258>.
- 686 Cellot G, Cherubini E (2014) GABAergic signaling as therapeutic target for autism spectrum disorders. *Front*  
687 *Pediatr* 2:70 Available at:  
688 [http://www.pubmedcentral.nih.gov/articlerender.fcgi?artid=4085902&tool=pmcentrez&rendertype=abstra](http://www.pubmedcentral.nih.gov/articlerender.fcgi?artid=4085902&tool=pmcentrez&rendertype=abstract)  
689 [ct](http://www.pubmedcentral.nih.gov/articlerender.fcgi?artid=4085902&tool=pmcentrez&rendertype=abstract).
- 690 Chen SX, Kim AN, Peters AJ, Komiyama T (2015) Subtype-specific plasticity of inhibitory circuits in motor  
691 cortex during motor learning. *Nat Neurosci* 18:1109–1115 Available at:  
692 [http://www.nature.com/neuro/journal/v18/n8/full/nn.4049.html?WT.ec\\_id=NEURO-](http://www.nature.com/neuro/journal/v18/n8/full/nn.4049.html?WT.ec_id=NEURO-201508&spMailingID=49196618&spUserID=MTMyMDY4MzI3NDgzS0&spJobID=723694367&spRepo)  
693 [201508&spMailingID=49196618&spUserID=MTMyMDY4MzI3NDgzS0&spJobID=723694367&spRepo](http://www.nature.com/neuro/journal/v18/n8/full/nn.4049.html?WT.ec_id=NEURO-201508&spMailingID=49196618&spUserID=MTMyMDY4MzI3NDgzS0&spJobID=723694367&spRepo)  
694 [rtId=NzIzNjk0MzY3S0%5Cnhttp://www.nature.com/neuro/journal/v18/n8/pdf/nn.4049.pdf](http://www.nature.com/neuro/journal/v18/n8/pdf/nn.4049.pdf).
- 695 Chia PH, Chen B, Li P, Rosen MK, Shen K (2014) Local F-actin network links synapse formation and axon  
696 branching. *Cell* 156:208–220 Available at: <http://dx.doi.org/10.1016/j.cell.2013.12.009> [Accessed January  
697 21, 2014].
- 698 Chia PH, Li P, Shen K (2013) Cellular and molecular mechanisms underlying presynapse formation. *J Cell Biol*  
699 203:11–22 Available at: <http://www.ncbi.nlm.nih.gov/pubmed/24127213> [Accessed January 28, 2014].
- 700 Christensen JG, Schreck R, Burrows J, Kuruganti P, Chan E, Le P, Chen J, Wang X, Ruslim L, Blake R, Lipson  
701 KE, Ramphal J, Do S, Cui JJ, Cherrington JM, Mendel DB (2003) A Selective Small Molecule Inhibitor of  
702 c-Met Kinase Inhibits c-Met-Dependent Phenotypes in Vitro and Exhibits Cytoreductive Antitumor  
703 Activity in Vivo. *Cancer Res* 63:7345–7355.
- 704 Cingolani LA, Goda Y (2008) Actin in action: the interplay between the actin cytoskeleton and synaptic  
705 efficacy. *Nat Rev Neurosci* 9:344–356 Available at: <http://www.nature.com/doi/doi/10.1038/nrn2373>.
- 706 Deguchi Y, Harada M, Shinohara R, Lazarus M, Cherasse Y, Urade Y, Yamada D, Sekiguchi M, Watanabe D,  
707 Furuyashiki T, Narumiya S (2016) mDia and ROCK Mediate Actin-Dependent Presynaptic Remodeling  
708 Regulating Synaptic Efficacy and Anxiety. *Cell Rep* 17:2405–2417 Available at:  
709 <http://dx.doi.org/10.1016/j.celrep.2016.10.088>.
- 710 Dobie FA, Craig AM (2011) Inhibitory Synapse Dynamics: Coordinated Presynaptic and Postsynaptic Mobility  
711 and the Major Contribution of Recycled Vesicles to New Synapse Formation. *J Neurosci* 31:10481–10493  
712 Available at: <http://www.jneurosci.org/cgi/doi/10.1523/JNEUROSCI.6023-10.2011> [Accessed July 20,  
713 2011].

- 714 Eagleson KL, Milner TA, Xie Z, Levitt P (2013) Synaptic and extrasynaptic location of the receptor tyrosine  
715 kinase met during postnatal development in the mouse neocortex and hippocampus. *J Comp Neurol*  
716 521:3241–3259 Available at:  
717 <http://www.pubmedcentral.nih.gov/articlerender.fcgi?artid=3942873&tool=pmcentrez&rendertype=abstract>  
718 [Accessed November 21, 2014].
- 719 Eagleson KL, Xie Z, Levitt P (2017) The Pleiotropic MET Receptor Network: Circuit Development and the  
720 Neural-Medical Interface of Autism. *Biol Psychiatry* 81:424–433 Available at:  
721 <http://linkinghub.elsevier.com/retrieve/pii/S0006322316327780>.
- 722 Esteves da Silva M, Adrian M, Schätzle P, Lipka J, Watanabe T, Cho S, Futai K, Wierenga CJ, Kapitein LC,  
723 Hoogenraad CC, Schätzle P, Lipka J, Watanabe T, Cho S, Futai K, Wierenga CJ, Kapitein LC,  
724 Hoogenraad CC (2015) Positioning of AMPA Receptor-Containing Endosomes Regulates Synapse  
725 Architecture. *Cell Rep* 13:933–943 Available at: <http://www.ncbi.nlm.nih.gov/pubmed/26565907>  
726 [Accessed November 16, 2015].
- 727 Flores CE, Nikonenko I, Mendez P, Fritschy J-M, Tyagarajan SK, Muller D (2015) Activity-dependent  
728 inhibitory synapse remodeling through gephyrin phosphorylation. *Proc Natl Acad Sci* 112:E65–E72  
729 Available at: <http://www.pnas.org/lookup/doi/10.1073/pnas.1411170112>.
- 730 Frias CP, Wierenga CJ (2013) Activity-dependent adaptations in inhibitory axons. *Front Cell Neurosci* 7:219  
731 Available at: <http://www.ncbi.nlm.nih.gov/pubmed/24312009> [Accessed December 12, 2013].
- 732 Froemke RC (2015) Plasticity of Cortical Excitatory-Inhibitory Balance. *Annu Rev Neurosci* 38:195–219  
733 Available at: <http://www.ncbi.nlm.nih.gov/pubmed/25897875> [Accessed April 30, 2015].
- 734 Fu Y, Huang ZJ (2010) Differential dynamics and activity-dependent regulation of  $\alpha$ - and  $\beta$ -neurexins at  
735 developing GABAergic synapses. *Proc Natl Acad Sci U S A* 107:22699–22704 Available at:  
736 <http://www.ncbi.nlm.nih.gov/pubmed/21149722> [Accessed January 3, 2011].
- 737 Fu Y, Wu X, Lu J, Huang ZJ (2012) Presynaptic GABAB Receptor Regulates Activity-Dependent Maturation  
738 and Patterning of Inhibitory Synapses through Dynamic Allocation of Synaptic Vesicles. *Front Cell*  
739 *Neurosci* 6:1–20 Available at:  
740 [http://www.frontiersin.org/Cellular\\_Neuroscience/10.3389/fncel.2012.00057/abstract](http://www.frontiersin.org/Cellular_Neuroscience/10.3389/fncel.2012.00057/abstract) [Accessed December  
741 10, 2012].
- 742 Ganguly A, Tang Y, Wang L, Ladt K, Loi J, Dargent B, Leterrier C, Roy S (2015) A dynamic formin-dependent  
743 deep F-actin network in axons. *J Cell Biol* 210:401–417 Available at:  
744 <http://www.jcb.org/cgi/doi/10.1083/jcb.201506110>.
- 745 Giacobini P, Messina A, Morello F, Ferraris N, Corso S, Penachioni J, Giordano S, Tamagnone L, Fasolo A  
746 (2008) Semaphorin 4D regulates gonadotropin hormone-releasing hormone-1 neuronal migration through  
747 PlexinB1-Met complex. *J Cell Biol* 183:555–566.
- 748 Giordano S, Corso S, Conrotto P, Artigiani S, Gilestro G, Barberis D, Tamagnone L, Comoglio PM (2002) The  
749 semaphorin 4D receptor controls invasive growth by coupling with Met. *Nat Cell Biol* 4:720–724  
750 Available at: <http://www.ncbi.nlm.nih.gov/pubmed/12198496> [Accessed April 11, 2016].
- 751 Hensch TK (2004) Critical Period Regulation. *Annu Rev Neurosci* 27:549–579 Available at:  
752 <http://www.annualreviews.org/doi/10.1146/annurev.neuro.27.070203.144327>.
- 753 Hensch TK (2005) Critical period plasticity in local cortical circuits. *Nat Rev Neurosci* 6:877–888 Available at:  
754 <http://www.ncbi.nlm.nih.gov/pubmed/16261181>.
- 755 Heukers R, Altintas I, Raghoenath S, De Zan E, Pepermans R, Roovers RC, Haselberg R, Hennink WE,  
756 Schiffelers RM, Kok RJ, Van Bergen en Henegouwen PMP (2014) Targeting hepatocyte growth factor  
757 receptor (Met) positive tumor cells using internalizing nanobody-decorated albumin nanoparticles.  
758 *Biomaterials* 35:601–610 Available at: <http://dx.doi.org/10.1016/j.biomaterials.2013.10.001>.
- 759 Honkura N, Matsuzaki M, Noguchi J, Ellis-Davies GCR, Kasai H (2008) The subsynaptic organization of actin  
760 fibers regulates the structure and plasticity of dendritic spines. *Neuron* 57:719–729 Available at:  
761 <http://www.ncbi.nlm.nih.gov/pubmed/18341992> [Accessed July 4, 2011].

- 762 Isaacson JS, Scanziani M (2011) How inhibition shapes cortical activity. *Neuron* 72:231–243 Available at:  
763 <http://www.ncbi.nlm.nih.gov/pubmed/22017986> [Accessed July 14, 2012].
- 764 Judson MC, Bergman MY, Campbell DB, Eagleson KL, Levitt P (2009) Dynamic gene and protein expression  
765 patterns of the autism-associated met receptor tyrosine kinase in the developing mouse forebrain. *J Comp*  
766 *Neurol* 513:511–531.
- 767 Keck T, Scheuss V, Jacobsen RI, Wierenga CJ, Eysel UT, Bonhoeffer T, Hübener M (2011) Loss of sensory  
768 input causes rapid structural changes of inhibitory neurons in adult mouse visual cortex. *Neuron* 71:869–  
769 882 Available at: <http://linkinghub.elsevier.com/retrieve/pii/S0896627311005642> [Accessed September 9,  
770 2011].
- 771 Kolodkin AL, Matthes DJ, Goodman CS (1993) The semaphorin genes encode a family of transmembrane and  
772 secreted growth cone guidance molecules. *Cell* 75:1389–1399.
- 773 Krueger-Burg D, Papadopoulos T, Brose N (2017) Organizers of inhibitory synapses come of age. *Curr Opin*  
774 *Neurobiol* 45:66–77 Available at: <http://dx.doi.org/10.1016/j.conb.2017.04.003>.
- 775 Kuriu T, Yanagawa Y, Konishi S (2012) Activity-dependent coordinated mobility of hippocampal inhibitory  
776 synapses visualized with presynaptic and postsynaptic tagged-molecular markers. *Mol Cell Neurosci*  
777 49:184–195 Available at: <http://www.ncbi.nlm.nih.gov/pubmed/22146684> [Accessed December 12, 2011].
- 778 Kuzirian MS, Moore AR, Staudenmaier EK, Friedel RH, Paradis S (2013) The class 4 semaphorin Sema4D  
779 promotes the rapid assembly of GABAergic synapses in rodent hippocampus. *J Neurosci* 33:8961–8973  
780 Available at: <http://www.ncbi.nlm.nih.gov/pubmed/23699507> [Accessed May 22, 2013].
- 781 Leterrier C, Dubey P, Roy S (2017) The nano-architecture of the axonal cytoskeleton. *Nat Rev Neurosci* 18:713–  
782 726 Available at: <http://www.nature.com/doi/10.1038/nrn.2017.129>.
- 783 Lo F-S, Erzurumlu RS, Powell EM (2016) Insulin-Independent GABAA Receptor-Mediated Response in the  
784 Barrel Cortex of Mice with Impaired Met Activity. *J Neurosci* 36:3691–3697 Available at:  
785 <http://www.ncbi.nlm.nih.gov/pubmed/27030755> [Accessed May 18, 2016].
- 786 López-Bendito G, Sturgess K, Erdélyi F, Szabó G, Molnár Z, Paulsen O (2004) Preferential origin and layer  
787 destination of GAD65-GFP cortical interneurons. *Cereb Cortex* 14:1122–1133 Available at:  
788 <http://www.ncbi.nlm.nih.gov/pubmed/15115742>.
- 789 Lu W, Bromley-Coolidge S, Li J (2017) Regulation of GABAergic synapse development by postsynaptic  
790 membrane proteins. *Brain Res Bull* 129:30–42.
- 791 Marín O (2012) Interneuron dysfunction in psychiatric disorders. *Nat Rev Neurosci* 13:107–120 Available at:  
792 <http://www.ncbi.nlm.nih.gov/pubmed/22251963> [Accessed October 9, 2012].
- 793 Martins GJ, Shahrokh M, Powell EM (2011) Genetic disruption of Met signaling impairs GABAergic striatal  
794 development and cognition. *Neuroscience* 176:199–209 Available at:  
795 <http://dx.doi.org/10.1016/j.neuroscience.2010.12.058> [Accessed May 18, 2016].
- 796 Müllner FE, Wierenga CJ, Bonhoeffer T (2015) Precision of inhibition: dendritic inhibition by individual  
797 GABAergic synapses on hippocampal pyramidal cells is confined in space and time. *Neuron* 87:576–589.
- 798 Nelson SB, Valakh V (2015) Excitatory/Inhibitory Balance and Circuit Homeostasis in Autism Spectrum  
799 Disorders. *Neuron* 87:684–698 Available at:  
800 <http://linkinghub.elsevier.com/retrieve/pii/S0896627315006753>.
- 801 Oh WC, Lutz S, Castillo PE, Kwon H (2016) De novo synaptogenesis induced by GABA in the developing  
802 mouse cortex. *Science* (80- ) 5206.
- 803 Oinuma I, Katoh H, Negishi M (2006) Semaphorin 4D/Plexin-B1-mediated R-Ras GAP activity inhibits cell  
804 migration by regulating  $\beta 1$  integrin activity. *J Cell Biol* 173:601–613.
- 805 Orr BO, Fetter RD, Davis GW (2017) Retrograde semaphorin–plexin signalling drives homeostatic synaptic  
806 plasticity. *Nature* 550:109–113 Available at: <http://www.nature.com/doi/10.1038/nature24017>.

- 807 Paradis S, Harrar DB, Lin Y, Koon AC, Hauser JL, Griffith EC, Zhu L, Brass LF, Chen C, Greenberg ME  
808 (2007) An RNAi-based approach identifies molecules required for glutamatergic and GABAergic synapse  
809 development. *Neuron* 53:217–232 Available at:  
810 <http://linkinghub.elsevier.com/retrieve/pii/S0896627306009974>.
- 811 Pasterkamp RJ (2012) Getting neural circuits into shape with semaphorins. *Nat Rev Neurosci* 13:605–618  
812 Available at: <http://dx.doi.org/10.1038/nrn3302>.
- 813 Peng Y, Huentelman M, Smith C, Qiu S (2013) MET Receptor Tyrosine Kinase as an Autism Genetic Risk  
814 Factor. *Int Rev Neurobiol* 113:135–165.
- 815 Piccioli ZD, Littleton JT (2014) Retrograde BMP signaling modulates rapid activity-dependent synaptic growth  
816 via presynaptic LIM kinase regulation of cofilin. *J Neurosci* 34:4371–4381 Available at:  
817 <http://www.ncbi.nlm.nih.gov/pubmed/24647957>.
- 818 Qiu S, Lu Z, Levitt P (2014) MET Receptor Tyrosine Kinase Controls Dendritic Complexity, Spine  
819 Morphogenesis, and Glutamatergic Synapse Maturation in the Hippocampus. *J Neurosci* 34:16166–16179  
820 Available at: <http://www.jneurosci.org/cgi/doi/10.1523/JNEUROSCI.2580-14.2014>.
- 821 Raissi AJ, Staudenmaier EK, David S, Hu L, Paradis S (2013) Sema4D localizes to synapses and regulates  
822 GABAergic synapse development as a membrane-bound molecule in the mammalian hippocampus. *Mol*  
823 *Cell Neurosci* 57:23–32 Available at: <http://www.ncbi.nlm.nih.gov/pubmed/24036351> [Accessed  
824 September 20, 2013].
- 825 Rex CS, Chen LY, Sharma A, Liu J, Babayan AH, Gall CM, Lynch G (2009) Different Rho GTPase-dependent  
826 signaling pathways initiate sequential steps in the consolidation of long-term potentiation. *J Cell Biol*  
827 186:85–97.
- 828 Schuemann A, Klawiter A, Bonhoeffer T, Wierenga CJ (2013) Structural plasticity of GABAergic axons is  
829 regulated by network activity and GABAA receptor activation. *Front Neural Circuits* 7:1–16 Available at:  
830 <http://journal.frontiersin.org/article/10.3389/fncir.2013.00113/abstract>.
- 831 Siddiqui TJ, Craig AM (2011) Synaptic organizing complexes. *Curr Opin Neurobiol* 21:132–143 Available at:  
832 <http://www.pubmedcentral.nih.gov/articlerender.fcgi?artid=3016466&tool=pmcentrez&rendertype=abstract>  
833 [Accessed August 15, 2013].
- 834 Sprekeler H (2017) Functional consequences of inhibitory plasticity: homeostasis, the excitation-inhibition  
835 balance and beyond. *Curr Opin Neurobiol* 43:198–203 Available at:  
836 <http://dx.doi.org/10.1016/j.conb.2017.03.014>.
- 837 Staras K (2007) Share and share alike: trading of presynaptic elements between central synapses. *Trends*  
838 *Neurosci* 30:292–298 Available at: <http://www.ncbi.nlm.nih.gov/pubmed/17467066>.
- 839 Suarez C, Carroll RT, Burke TA, Christensen JR, Bestul AJ, Sees JA, James ML, Sirotkin V, Kovar DR (2015)  
840 Profilin regulates F-Actin network homeostasis by favoring formin over Arp2/3 complex. *Dev Cell* 32:43–  
841 53.
- 842 Sun T, Krishnan R, Swiercz JM (2012) Grb2 mediates semaphorin-4D-dependent RhoA inactivation. *J Cell Sci*  
843 125:3557–3567 Available at: <http://www.ncbi.nlm.nih.gov/pubmed/22505611> [Accessed August 19,  
844 2013].
- 845 Swiercz JM, Worzfeld T, Offermanns S (2008) ErbB-2 and Met reciprocally regulate cellular signaling via  
846 plexin-B1. *J Biol Chem* 283:1893–1901 Available at: <http://www.ncbi.nlm.nih.gov/pubmed/18025083>  
847 [Accessed August 19, 2013].
- 848 Tyndall SJ, Walikonis RS (2006) The receptor tyrosine kinase met and its ligand hepatocyte growth factor are  
849 clustered at excitatory synapses and can enhance clustering of synaptic proteins. *Cell Cycle* 5:1560–1568.
- 850 Villa KL, Berry KP, Subramanian J, Cha JW, Oh WC, Kwon H-B, Kubota Y, So PTC, Nedivi E (2016)  
851 Inhibitory Synapses Are Repeatedly Assembled and Removed at Persistent Sites In Vivo. *Neuron* 89:756–  
852 769 Available at: <http://linkinghub.elsevier.com/retrieve/pii/S0896627316000118>.

- 853 Wierenga CJ (2017) Live imaging of inhibitory axons: Synapse formation as a dynamic trial-and-error process.  
854 *Brain Res Bull* 129:43–49 Available at: <http://dx.doi.org/10.1016/j.brainresbull.2016.09.018>.
- 855 Wierenga CJ, Becker N, Bonhoeffer T (2008) GABAergic synapses are formed without the involvement of  
856 dendritic protrusions. *Nat Neurosci* 11:1044–1052 Available at:  
857 <http://www.ncbi.nlm.nih.gov/pubmed/18711391>.
- 858 Wierenga CJ, Müllner FE, Rinke I, Keck T, Stein V, Bonhoeffer T (2010) Molecular and electrophysiological  
859 characterization of GFP-expressing CA1 interneurons in GAD65-GFP mice. *PLoS One* 5:e15915  
860 Available at:  
861 <http://www.pubmedcentral.nih.gov/articlerender.fcgi?artid=3013138&tool=pmcentrez&rendertype=abstract>  
862 [Accessed March 10, 2012].
- 863 Xie Z, Eagleson KL, Wu H-H, Levitt P (2016) Hepatocyte Growth Factor Modulates MET Receptor Tyrosine  
864 Kinase and  $\beta$ -Catenin Functional Interactions to Enhance Synapse Formation. *Eneuro* 3:e0074.
- 865 Zhou Y, Gunput RAF, Pasterkamp RJ (2008) Semaphorin signaling: progress made and promises ahead. *Trends*  
866 *Biochem Sci* 33:161–170.
- 867
- 868



## 869 **FIGURE LEGENDS**

870

### 871 **Figure 1. Classification of presynaptic inhibitory boutons by their dynamics.**

872 **(A)** Time-lapse two-photon images of two inhibitory boutons (blue arrowheads) along a  
873 GAD65-GFP-labeled axon in the CA1 region of the hippocampus. These boutons were  
874 present at all time points, and therefore categorized as persistent boutons. Only every second  
875 image is shown for clarity. On the right, the same region is shown after fixation and staining  
876 against vesicular GABA transporter (VGAT, magenta). The zoom shows a single optical  
877 plane through the bouton to demonstrate overlap (white) of VGAT and GFP boutons. Time in  
878 minutes. Scale bars 2  $\mu\text{m}$  and 1  $\mu\text{m}$  (zoom).

879 **(B1-5)** Same as in A, showing examples of new (B1; absent during baseline), lost (B2; absent  
880 during wash-in), stabilizing (B3; non-persistent during baseline, and persistent during wash-  
881 in), destabilizing (B4; persistent during baseline, and non-persistent during wash-in) and  
882 transient (B5; non-persistent during both baseline and wash-in) boutons. Filled yellow  
883 arrowheads indicate that the bouton is present, and empty yellow arrowheads indicate that the  
884 bouton is absent at the time point shown.

885 **(C)** Average fraction of persistent (P) and non-persistent (NP) boutons at any given time  
886 point, and average fraction of the 5 subgroups of non-persistent boutons normalized to the  
887 total number of non-persistent boutons (N – new; L – lost; S – stabilizing; D – destabilizing;  
888 T – transient).

889 **(D)** Percentage of time points in which boutons were present during baseline (white) and  
890 wash-in (gray) periods. #: value for D was significantly different from N and T for wash-in  
891 ( $\chi^2$ ; D vs N,  $p = 0.002$ ; D vs T,  $p = 0.002$ ).

892 **(E)** Fraction of boutons positive for VGAT and gephyrin per axon. Two-way ANOVA  
893 analysis showed a significant effect on bouton type ( $p = 0.0098$ ). For gephyrin, P vs T,  $p =$   
894 0.001 (Sidak's multiple comparisons test).

895 **(F)** Fraction of boutons co-localizing with VGAT or gephyrin as a function of bouton  
896 lifetime (total number of time points (#TPs) present during the imaging period). Lost boutons  
897 ('L' in C,D) were not included.  $\chi^2$ : TP2-5,  $p = 0.21$ ; TP6-8,  $p = 0.02$ ; TP9-11,  $p = 0.13$ ; TP12-  
898 14,  $p = 0.35$ ; TP15,  $p = 0.008$ .

899 Confocal images in A are maximum intensity projections of 5-8 z stacks, while two-photon  
900 images are maximum intensity projections of 13-15 z stacks. Data are represented as mean  $\pm$   
901 SEM. Data in C and D from 90 axons from 24 independent experiments, data in E and F from

902 21 axons from 5 independent experiments for the VGAT staining (P: n=282 boutons; N:  
903 n=13; S: n=6; D: n=17; T: n=45) and from 15 axons from 4 independent experiments for the  
904 gephyrin staining (P: n=232 boutons; N: n=15; S: n=6; D: n=15; T: n=39). In F, n=14-28 per  
905 TP, except for TP15.

906

907 **Figure 2. Sema4D treatment promotes inhibitory bouton stabilization.**

908 **(A)** Time-lapse two-photon images of GFP-labeled inhibitory axons in the CA1 region of  
909 the hippocampus during baseline (5 time points) and wash-in (10 time points; grey box) of 1  
910 nM Fc - control (C; upper panel) or 1 nM Sema4D-Fc (S4D; bottom panel). Only every  
911 second image is shown for clarity. Persistent (blue) and non-persistent (yellow) boutons are  
912 indicated by arrowheads. Filled arrowheads indicate that the bouton is present, and empty  
913 arrowheads indicate that the bouton is absent at that time point. Images are maximum  
914 intensity projections of 11-18 z stacks. Time in minutes. Scale bar 5  $\mu$ m.

915 **(B)** Cumulative distribution of the change in mean bouton density during the wash-in  
916 period compared to baseline after wash-in of C or S4D (MW,  $p = 0.83$ ).

917 **(C)** Average fraction of subgroups of non-persistent boutons in C- and S4D-treated axons:  
918 N – new (MW,  $p = 0.86$ ); L – lost (MW,  $p = 0.93$ ); S – stabilizing (MW,  $p = 0.003$ ); D –  
919 destabilizing (MW,  $p = 0.25$ ); T – transient (MW,  $p = 0.89$ ).

920 **(D-H)** Density of new (D; MW,  $p = 0.41$ ), lost (E; MW,  $p = 0.61$ ), stabilizing (F; MW,  $p =$   
921  $0.003$ ), destabilizing (G; MW,  $p = 0.84$ ) and transient (H; MW,  $p = 0.34$ ) boutons in axons  
922 treated with 1 nM Fc (C) and 1 nM Sema4D-Fc (S4D). Each dot represents an individual  
923 axon.

924 **(I)** Stabilization of inhibitory boutons, as determined by the change (compared to  
925 baseline) in density of boutons that were present at 5 consecutive time points during the  
926 imaging period: 0'-40' (baseline), 50'-90' (wash-in) and 100'-140' (wash-in). Two-way  
927 ANOVA analysis showed a significant effect of both treatment ( $p = 0.04$ ) and time ( $p = 0.03$ ).

928 **(J)** Density of boutons that stabilized in the last 5 time points (TPs) (MW,  $p = 0.0008$ ).

929 **(K)** Frequency distribution of the stabilizing bouton density in C- and S4D-treated axons  
930 ( $\chi^2$ ,  $p = 0.03$ ).

931 Data are represented as mean  $\pm$  SEM. Data from 20 control axons (N=6) and 22 S4D-treated  
932 axons (N=5).

933

934 **Figure 3. Sema4D increases overall inhibitory synaptic density.**



935 **(A)** Fraction of non-persistent boutons after treatment with 1 nM Fc (control; C) or 1 nM  
936 Semaphorin 4D-Fc (S4D) for 6 hours (400 minutes of total treatment). N – new (MW,  $p = 0.91$ ) L –  
937 lost (MW,  $p = 0.13$ ); S – stabilizing (MW,  $p = 0.0003$ ); D – destabilizing (MW,  $p = 0.16$ ); T –  
938 transient (MW,  $p = 0.02$ ).

939 **(B)** Density of non-persistent boutons after treatment with 1 nM Fc (C) or 1 nM Semaphorin 4D-  
940 Fc (S4D) for 6 hours. N: MW,  $p = 0.74$ ; L: MW,  $p = 0.29$ ; S: MW,  $p = 0.03$ ; D: MW,  $p =$   
941  $0.09$ ; T: MW,  $p = 0.11$ .

942 **(C)** Density of stabilizing boutons after treatment with Fc or S4D for 50, 100 and 400  
943 minutes. Two-way ANOVA analysis showed that S4D increased bouton density independent  
944 of time ( $p = 0.0002$ ). At 100',  $p = 0.005$  (Sidak's multiple comparisons test).

945 **(D)** Same as B, but for transient boutons. Two-Way ANOVA analysis indicated a  
946 significant interaction between treatment and time (§;  $p = 0.03$ ).

947 **(E)** Representative images of CA1 dendritic area of GAD65-GFP hippocampal slices  
948 treated with 1 nM Fc (C) or 1 nM Semaphorin 4D-Fc (S4D) for 24 h, and immunostained for VGAT  
949 (green) and gephyrin (magenta). Images are average intensity projections of 5 z stacks. Scale  
950 bar 2  $\mu\text{m}$ .

951 **(F)** Example of an inhibitory synapse (white box in D), identified as the apposition of  
952 VGAT (green) and gephyrin (magenta) puncta. The respective xz and yz projections show the  
953 close apposition of the two markers. Images are maximum intensity projections of 6 z stacks.  
954 Scale bar 1  $\mu\text{m}$ .

955 **(G)** Density of inhibitory synapses in slices treated with Fc or S4D for 24 h (MW,  $p =$   
956  $0.03$ ).

957 **(H)** Representative whole-cell voltage-clamp recordings of miniature inhibitory  
958 postsynaptic currents (mIPSCs) from CA1 pyramidal cells in organotypic hippocampal slices  
959 treated for 24 h with 1 nM Fc/DMSO (C) or 1 nM S4D/DMSO (S4D).

960 **(I-J)** Mean mIPSC amplitude (H) and frequency (I) in CA1 cells after 24 h treatment with  
961 Fc or S4D (H: MW,  $p = 0.35$ ; I: MW,  $p = 0.008$ ).

962 **(K)** Cumulative distribution of inter-event interval (IEI) of mIPSCs.

963 Data are represented as mean  $\pm$  SEM. Data in A,B from 15 control axons (N=4) and 17 S4D-  
964 treated axons (N=4), data in G from 15 control images (N=3) and 15 S4D images (N=3), and  
965 data in H-K from 14 control cells (N=5) and 14 S4D-treated cells (N=7).

966

967 **Figure 4. VGAT and gephyrin undergo different changes in response to Semaphorin 4D.**

968 (A) Normalized area of presynaptic vesicular GABA transporter (VGAT) puncta (after  
969 treatment with 1 nM S4D for 2 h, 6 h and 24 h). Dotted line represents control (treatment with  
970 1nM Fc for 2 h, 6 h and 24 h). Two-way ANOVA analysis showed that S4D treatment  
971 increased VGAT area independent of time ( $p = 0.005$ ).

972 (B) Normalized density of VGAT puncta, after treatment with 1 nM S4D for 2 h, 6 h and  
973 24 h. Dotted line represents control (treatment with 1nM Fc for 2 h, 6 h and 24 h).

974 (C) Cumulative distributions of the normalized area of VGAT after treatment with 1 nM  
975 S4D for 2, 6 and 24 h. Black line represents the normalized control values.  $p = 0.81$ ,  $p = 0.08$   
976 and  $p = 0.14$  (KS) for 2, 6 and 24 h, respectively.

977 (D-E) Same as in A-B, but for normalized area (D) and density (E) of postsynaptic gephyrin  
978 puncta. Two-way ANOVA analysis showed a significant effect of time ( $p = 0.04$ ) and an  
979 interaction between treatment and time (§;  $p = 0.04$ ) in E.

980 (F) Same as in C, but for normalized gephyrin density.  $p = 0.99$ ,  $p = 0.99$  and  $p < 0.0001$   
981 (KS) for 2, 6 and 24 h, respectively.

982 Data are represented as mean  $\pm$  SEM. Data from 15-20 control images (N=3-4) and 15-20  
983 S4D images (N=3-4) per time point.

984

### 985 **Figure 5. Sema4D induces local stabilization of inhibitory boutons.**

986 (A) Density of stabilizing boutons in axons treated with 1  
987 nM Fc (C) and 1 nM Sema4D-Fc (S4D), in the presence of 0.5  $\mu$ M TTX (MW,  $p = 0.17$ ).

988 (B) Stabilization of inhibitory boutons upon treatment  
989 with C or S4D in the presence of 0.5  $\mu$ M TTX, determined by the change (compared to  
990 baseline) in density of boutons that were present at 5 consecutive time points during the  
991 imaging period: 0'-40' (baseline), 50'-90' (wash-in) and 100'-140' (wash-in). Two-way  
992 ANOVA analysis showed a significant effect of treatment ( $p = 0.01$ ). At 100'-140',  $p = 0.04$   
993 (Sidak's multiple comparisons test).

994 (C) Fraction of axons with stabilizing boutons in axons  
995 treated with C or S4D, in normal or activity-depleted slices with TTX ( $\chi^2$  (p-values are  
996 Bonferroni-corrected): C vs S4D,  $p = 0.01$ ; C vs C+TTX,  $p = 0.58$ ; C+TTX vs S4D+TTX,  $p =$   
997 0.22; S4D vs S4D+TTX,  $p < 0.0001$ ).

998 (D) Frequency distribution of the stabilizing bouton  
999 density in C- and S4D-treated axons, in the presence of 0.5  $\mu$ M TTX ( $\chi^2$ ,  $p = 0.17$ ).

1000 **(E)** Representative image of the local treatment of GFP-  
1001 labeled inhibitory axons in the CA1 region of the hippocampus. The pipette was filled with  
1002 Alexa568 (red) to visualize the area of the puff (yellow circle). Scale bar 10  $\mu$ m.

1003 **(F)** Same as B, but for local treatment with 10 nM Fc  
1004 (control, C) or 10 nM S4D. Red line marks the puffing. Two-way ANOVA analysis showed a  
1005 significant effect of treatment ( $p = 0.0002$ ) and an interaction between treatment and time ( $\$$ ;  
1006  $p = 0.02$ ). At 50'-70',  $p = 0.003$  (Sidak's multiple comparisons test).

1007 **(G)** Cumulative distribution of the change in mean bouton  
1008 density after local treatment with C or S4D compared to baseline (MW,  $p = 0.045$ ).  
1009 Data are represented as mean  $\pm$  SEM. Data in A-D from 19 control axons (N=5) and 20 S4D-  
1010 treated axons (N=5), and in F-G from 15 control axons (N=6) and 17 S4D-treated axons  
1011 (N=6).

1012

1013 **Figure 6. Inhibitory bouton dynamics are regulated by actin.**

1014 **(A)** Time-lapse two-photon images of GAD65-GFP-labeled axons in the CA1 region of  
1015 the hippocampus during baseline (5 time points) and wash-in (10 time points; grey box) of  
1016 DMSO - control (C; upper panel), 200 nM Jasplakinolide (Jasp; middle panel) or 100 nM  
1017 LatrunculinB (LatB; bottom panel). Only every second image is shown for clarity. Persistent  
1018 and non-persistent boutons are indicated as in Figure 2. Images are maximum intensity  
1019 projections of 12-14 z stacks. Time in minutes. Scale bar 5  $\mu$ m.

1020 **(B)** Fraction of non-persistent (NP) boutons in C and Jasp-treated axons: N – new (MW,  $p$   
1021 = 0.37); L – lost (MW,  $p = 0.18$ ); S – stabilizing (MW,  $p = 0.49$ ); D – destabilizing (MW,  $p =$   
1022 0.95); T – transient (MW,  $p = 0.93$ ).

1023 **(C)** Same as in B, but for C and LatB-treated axons (N: MW,  $p = 0.99$ ; L: MW,  $p = 0.66$ ;  
1024 S: MW,  $p = 0.01$ ; D: MW,  $p = 0.6$ ; T: MW,  $p = 0.29$ ).

1025 **(D)** Density of stabilizing boutons in control, Jasp- (MW:  $p = 0.55$ ) and LatB-treated  
1026 axons (MW:  $p = 0.005$ ).

1027 **(E)** Frequency distribution of the stabilizing bouton density in C, Jasp- and LatB-treated  
1028 slices ( $\chi^2$ ; C vs Jasp,  $p = 0.31$ ; C vs LatB,  $p = 0.0005$ ).

1029 **(F)** Same as E, but for combined treatment with 100 nM LatB/1 nM Fc (LatB+C) or 100  
1030 nM LatB/1 nM Sema4D (LatB+S4D) ( $\chi^2$ ,  $p = 0.37$ ).

1031 **(G)** Same as B, but for combined treatment with LatB+C or LatB+S4D (N: MW,  $p =$   
1032 0.005; L: MW,  $p = 0.58$ ; S: MW,  $p = 0.96$ ; D: MW,  $p = 0.82$ ; T: MW,  $p = 0.52$ ).

1033 Data are represented as mean  $\pm$  SEM. Data in B from 21 control axons (N=6) and 20 Jasp-  
1034 treated axons (N=5), in C from 18 control axons (N=5) and 20 LatB-treated axons (N=5) and  
1035 in F-G from 18 LatB+Fc- (N=4) and 20 LatB+S4D-treated axons (N=5).

1036

1037 **Figure 7. Latrunculin B treatment does not promote inhibitory synapse formation.**

1038 (A) Normalized area of presynaptic vesicular GABA transporter (VGAT) puncta (after  
1039 treatment with 100 nM LatB for 2 h and 24 h). Dotted line represents control (treatment with  
1040 DMSO for 2 h and 24 h). Two-way ANOVA analysis indicated a significant effect of time ( $p$   
1041 = 0.02) and an interaction between treatment and time (§,  $p = 0.02$ ).

1042 (B) Normalized density of VGAT, after treatment with 100 nM LatB for 2 h and 24 h.  
1043 Dotted line represents control (treatment with DMSO for 2 h and 24 h).

1044 (C) Cumulative distributions of the normalized area of VGAT after treatment with 100 nM  
1045 LatB for 2 and 24 h. Black line represents the normalized control values.  $p = 0.047$  and 0.33  
1046 (KS) for 2 and 24 h, respectively.

1047 (D-E) Same as in A-B, but for the area (D) and density (E) of postsynaptic gephyrin puncta.  
1048 In E, Two-way ANOVA analysis showed a significant effect of time ( $p = 0.04$ ) and interaction  
1049 between treatment and time (§,  $p = 0.04$ ).

1050 (F) Same as in I, but for normalized gephyrin density.  $p = 0.047$  and 0.33 (KS) for 2 and  
1051 24 h, respectively.

1052 (H) Same as A, but for normalized density of inhibitory synapses.

1053 Data are represented as mean  $\pm$  SEM. Data from 15 control images (N=3) and 15 LatB images  
1054 (N=3) per time point.

1055

1056 **Figure 8. Inhibitory bouton stabilization by Sema4D requires MET.**

1057 (A) Time-lapse two-photon images of GAD65-GFP-labeled axons in organotypic  
1058 hippocampal slices during wash-in (grey box) of combination of 1 nM Sema4D and DMSO  
1059 (S4D; upper panel) or combination of 1 nM Sema4D with 1  $\mu$ M PHA-665752 (S4D+PHA;  
1060 bottom panel). Only every second image is shown for clarity. Persistent and non-persistent  
1061 boutons are indicated as in Figure 2. Images are maximum intensity projections of 15-16 z  
1062 stacks. Scale bar 5  $\mu$ m.

1063 (B) Density of non-persistent boutons in slices treated with DMSO (C) and 1  $\mu$ M PHA-  
1064 665752 (PHA): N – new (MW,  $p = 0.28$ ); L – lost (MW,  $p = 0.77$ ); S – stabilizing (MW,  $p =$   
1065 0.98); D – destabilizing (MW,  $p = 0.24$ ); T – transient (MW,  $p = 0.67$ ).

1066 (C) Fraction of non-persistent (NP) boutons in S4D- and S4D+PHA-treated axons: N:  
1067 MW,  $p = 0.34$ ; L: MW,  $p = 0.74$ ; S: MW,  $p = 0.01$ ; D: MW,  $p = 0.64$ ; T: MW,  $p = 0.53$ .  
1068 (D) Density of stabilizing boutons in slices treated with S4D or S4D+PHA (MW,  $p =$   
1069  $0.006$ ). Dotted line represents control values.  
1070 (E) Frequency distribution of the stabilizing bouton density in S4D- and S4D+PHA-  
1071 treated slices ( $\chi^2$ ,  $p = 0.048$ ).  
1072 (F) Representative images of hippocampal slices treated with S4D (upper panel) or  
1073 S4D+PHA (bottom panel) for 100', and stained for presynaptic VGAT. Images are average  
1074 intensity projections of 5 z stacks. Scale bar 5  $\mu\text{m}$ .  
1075 (G) Normalized mean staining intensity for VGAT in S4D- and S4D+PHA-treated slices  
1076 (MW,  $p = 0.009$ ). Control value is indicated with dotted line.  
1077 (H) Cumulative distribution of inter-event interval (IEI) of mIPSCs from CA1 pyramidal  
1078 cells in organotypic slices after treatment with 1 nM Fc/DMSO (C), 1 nM S4D/DMSO (S4D)  
1079 or 1nM S4D/1  $\mu\text{M}$  PHA-665752 (S4D+PHA) for 24 h. C and S4D as in Figure 3K.  
1080 (I) Fraction of non-persistent boutons in axons treated with MQ (control) or 10  $\mu\text{M}$  Y-  
1081 27632 (ROCK inhibitor): N: MW,  $p = 0.05$ ; L: MW,  $p = 0.39$ ; S: MW,  $p = 0.02$ ; D: MW,  $p =$   
1082  $0.38$ ; T: MW,  $p = 0.78$ .  
1083 Data are represented as mean  $\pm$  SEM. Data in B from 18 control axons (N=4) and 18 PHA-  
1084 treated axons (N=4), in C-E from 17 S4D-treated axons (N=4) and 16 S4D+PHA-treated  
1085 axons (N=4), in F-G from 16 images of S4D-treated slices (N=3) and 23 images of  
1086 S4D+PHA-treated slices (N=4); in H from 14 control cells (N=5), 14 S4D-treated cells (N=7)  
1087 and 17 S4D+PHA-treated cells (N=5), and in I from 21 control axons (N=5) and 22 Y-27632-  
1088 treated axons (N=5).

1089

1090 **Figure 9. MET is enriched in a subset of inhibitory presynaptic boutons.**

1091 (A) Images of primary cultures of hippocampal neurons immunostained with MET  
1092 nanobody (red) and markers for excitatory synapses: presynaptic vesicular glutamate  
1093 transporter (VGLUT; green) and postsynaptic Homer (blue). The majority of MET puncta co-  
1094 localize with one or both markers (white arrows), but some MET puncta do not co-localize  
1095 (red arrows). Images are maximum intensity projections of 13 stacks. Scale bar 5  $\mu\text{m}$   
1096 (overview) and 2  $\mu\text{m}$  (zoom).  
1097 (B) Same as A, but neurons were stained with MET nanobody (red) and markers for  
1098 excitatory presynapses (VGLUT; green) and inhibitory presynapses (vesicular GABA  
1099 transporter VGAT; blue). White arrows indicate MET co-localizing with VGLUT and blue

1100 arrows indicate MET co-localizing with VGAT. Images are maximum intensity projections of  
1101 12 stacks. Scale bar 5  $\mu\text{m}$  (overview) and 2  $\mu\text{m}$  (zoom).

1102 **(C)** Same as A, but hippocampal neurons were stained with MET antibody (red) and  
1103 VGAT (blue). Blue arrows highlight MET puncta co-localizing with VGAT, while red arrows  
1104 indicate MET puncta that do not co-localize with VGAT. Images are maximum intensity  
1105 projections of 17-21 stacks. Scale bar 10  $\mu\text{m}$  (overview) and 2  $\mu\text{m}$  (zoom).

1106 **(D)** Representative images of GFP-labeled inhibitory boutons (green) in hippocampal  
1107 slices, stained with a nanobody (upper) and an antibody (lower panels) against MET  
1108 (magenta). Images are maximum intensity projections of 5-6 z stacks. White arrows indicate  
1109 MET enrichment in GFP-labeled boutons. Scale bar 5  $\mu\text{m}$ .

1110 **(E)** Fraction of GFP boutons positive for MET. Aspecific staining was determined by anti-  
1111 myc staining without nanobody ('C'; black) and random co-localization was determined by  
1112 inverting the MET channel ('Inv'; light gray) (Nanobody: KW,  $p = 0.002$ ; Antibody: MW,  $p$   
1113  $< 0.0001$ ).

1114 **(F)** Example of two inhibitory boutons (green) in hippocampal slices showing enrichment  
1115 in MET (magenta), and the respective xz and yz projections. Images are maximum intensity  
1116 projections of 6 z stacks. Scale bar 1  $\mu\text{m}$ .

1117 Data are represented as mean  $\pm$  SEM. Data in F from 10 control images (N=2), 12 images in  
1118 MET and inverted group (N=3) for the nanobody staining and 15 images in MET and inverted  
1119 group (N=3) for the antibody staining.

1120



**A** Persistent (P; ▶)

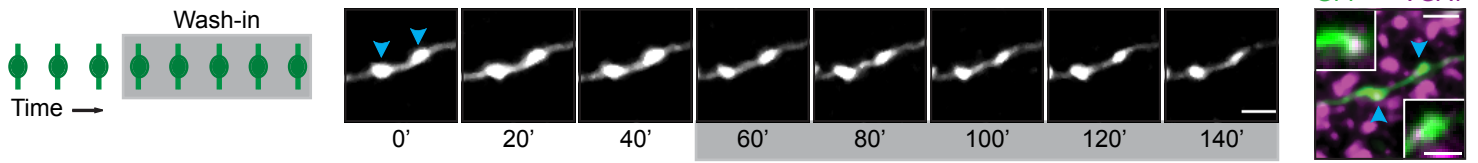

**B** Non-persistent (NP; present - ▶ - or absent - ▶ -)

1. New (N)

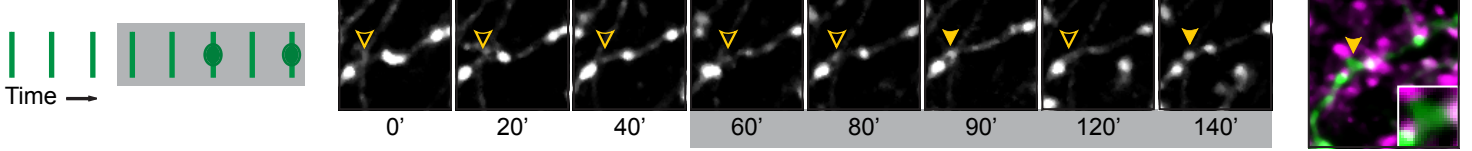

2. Lost (L)

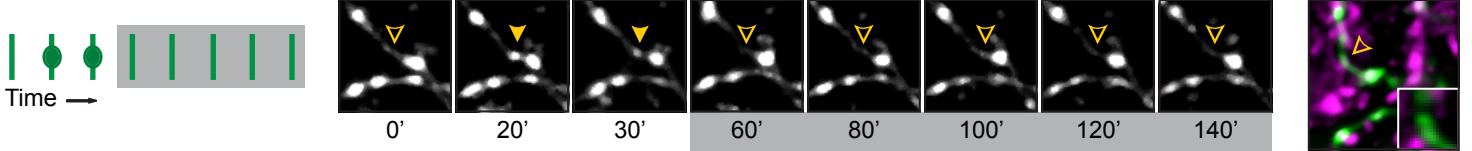

3. Stabilizing (S)

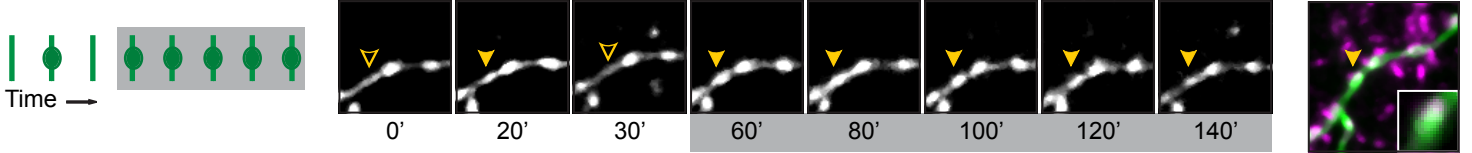

4. Destabilizing (D)

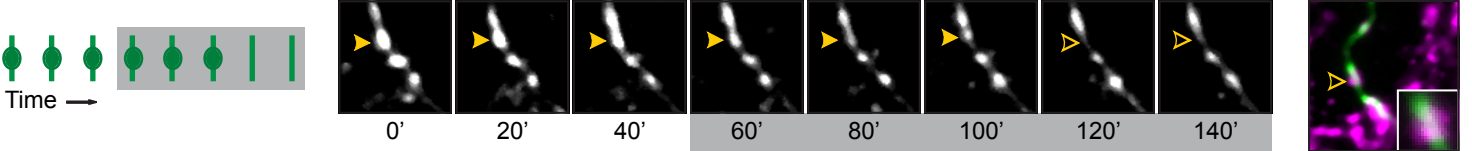

5. Transient (T)

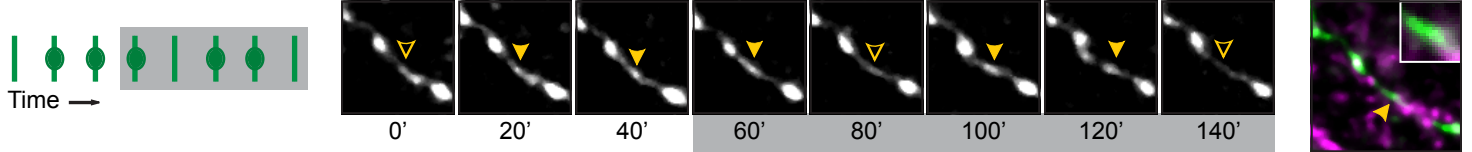

**C**

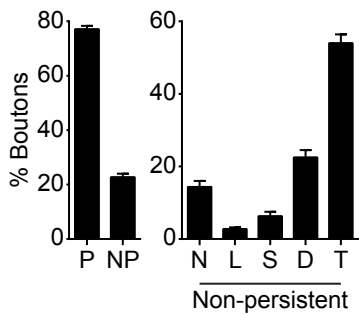

**D**

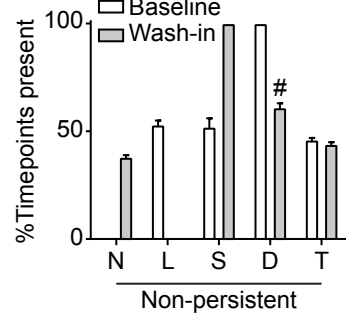

**E**

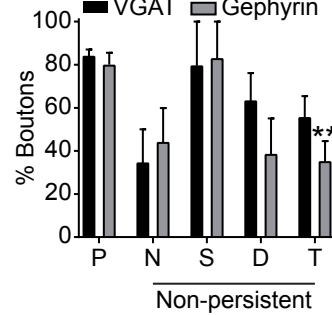

**F**

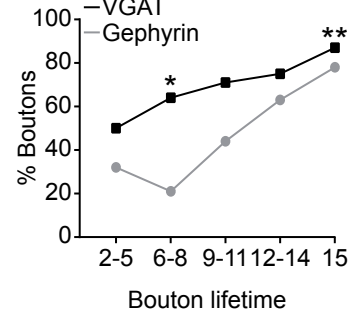



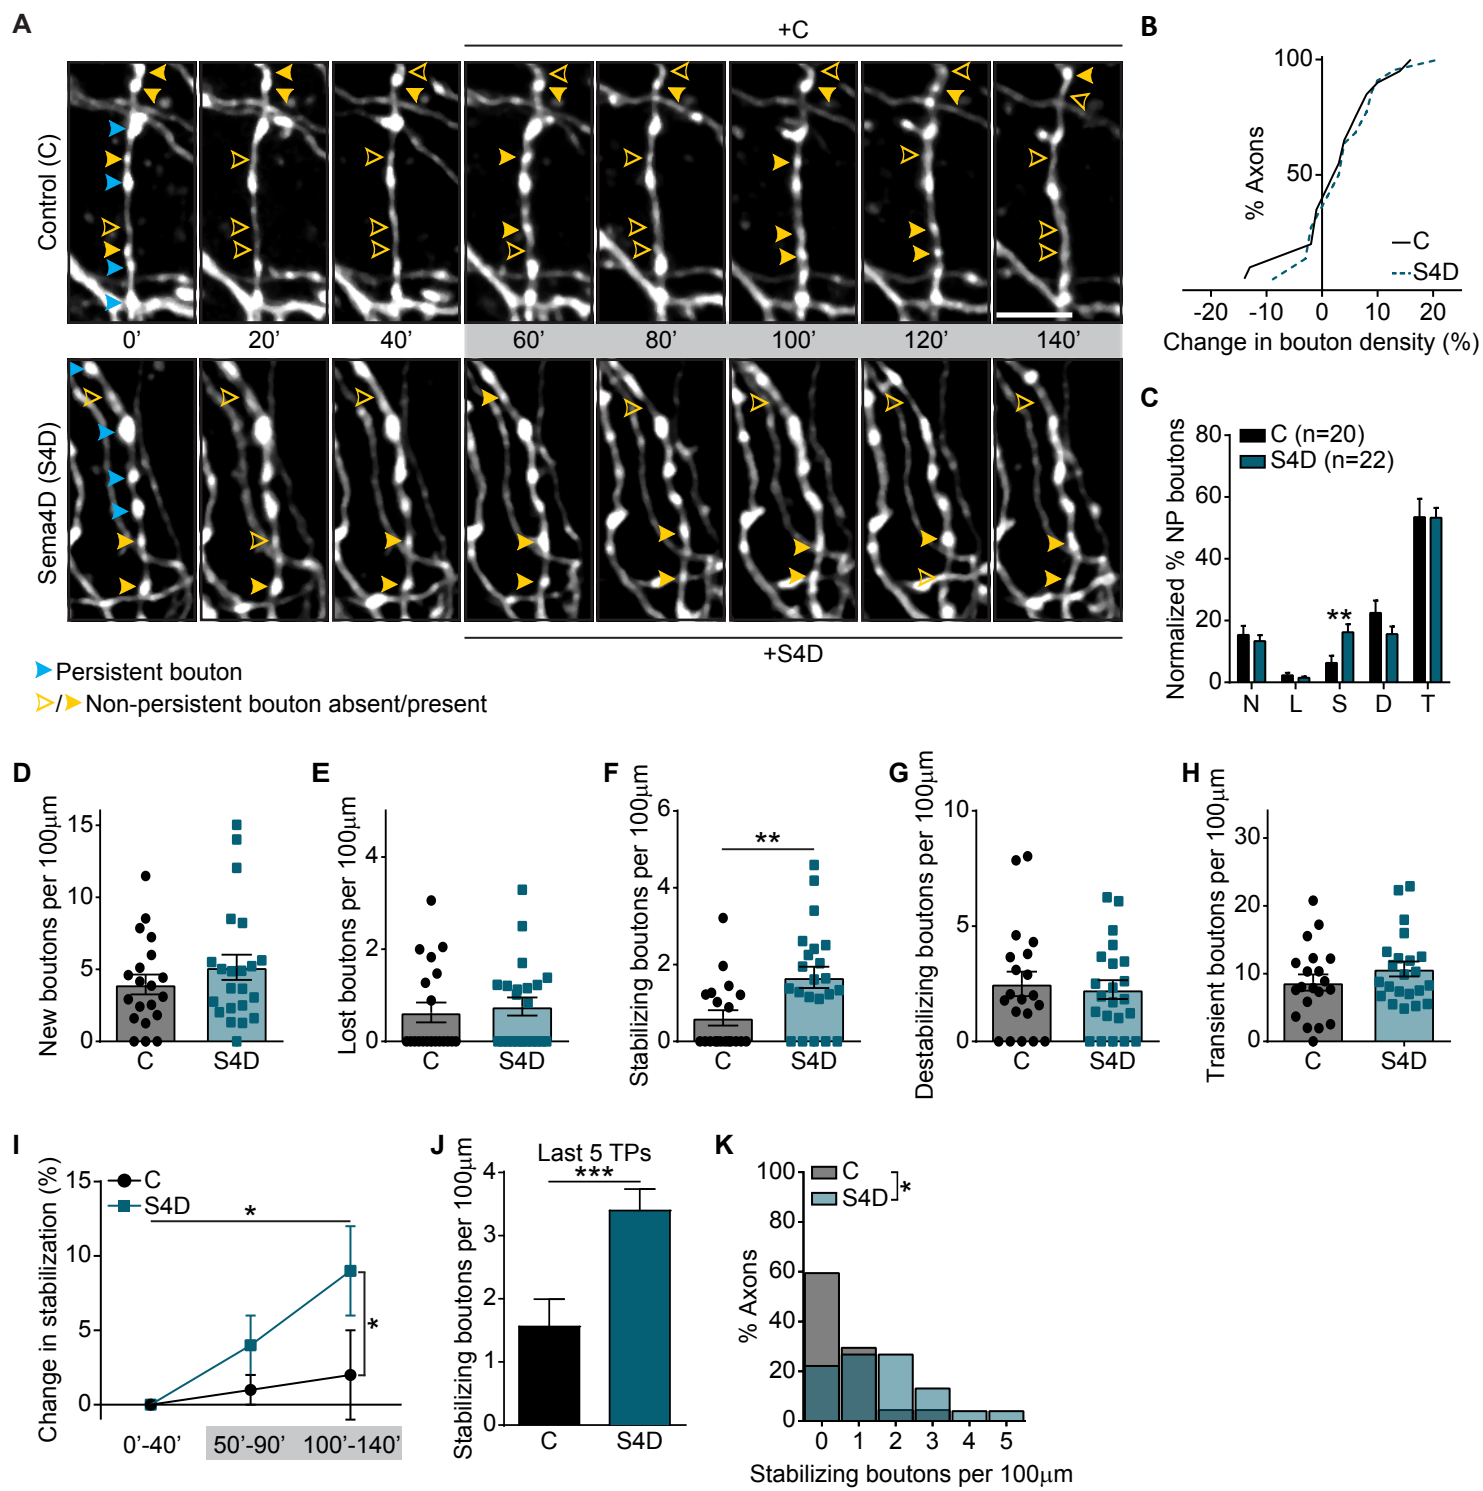

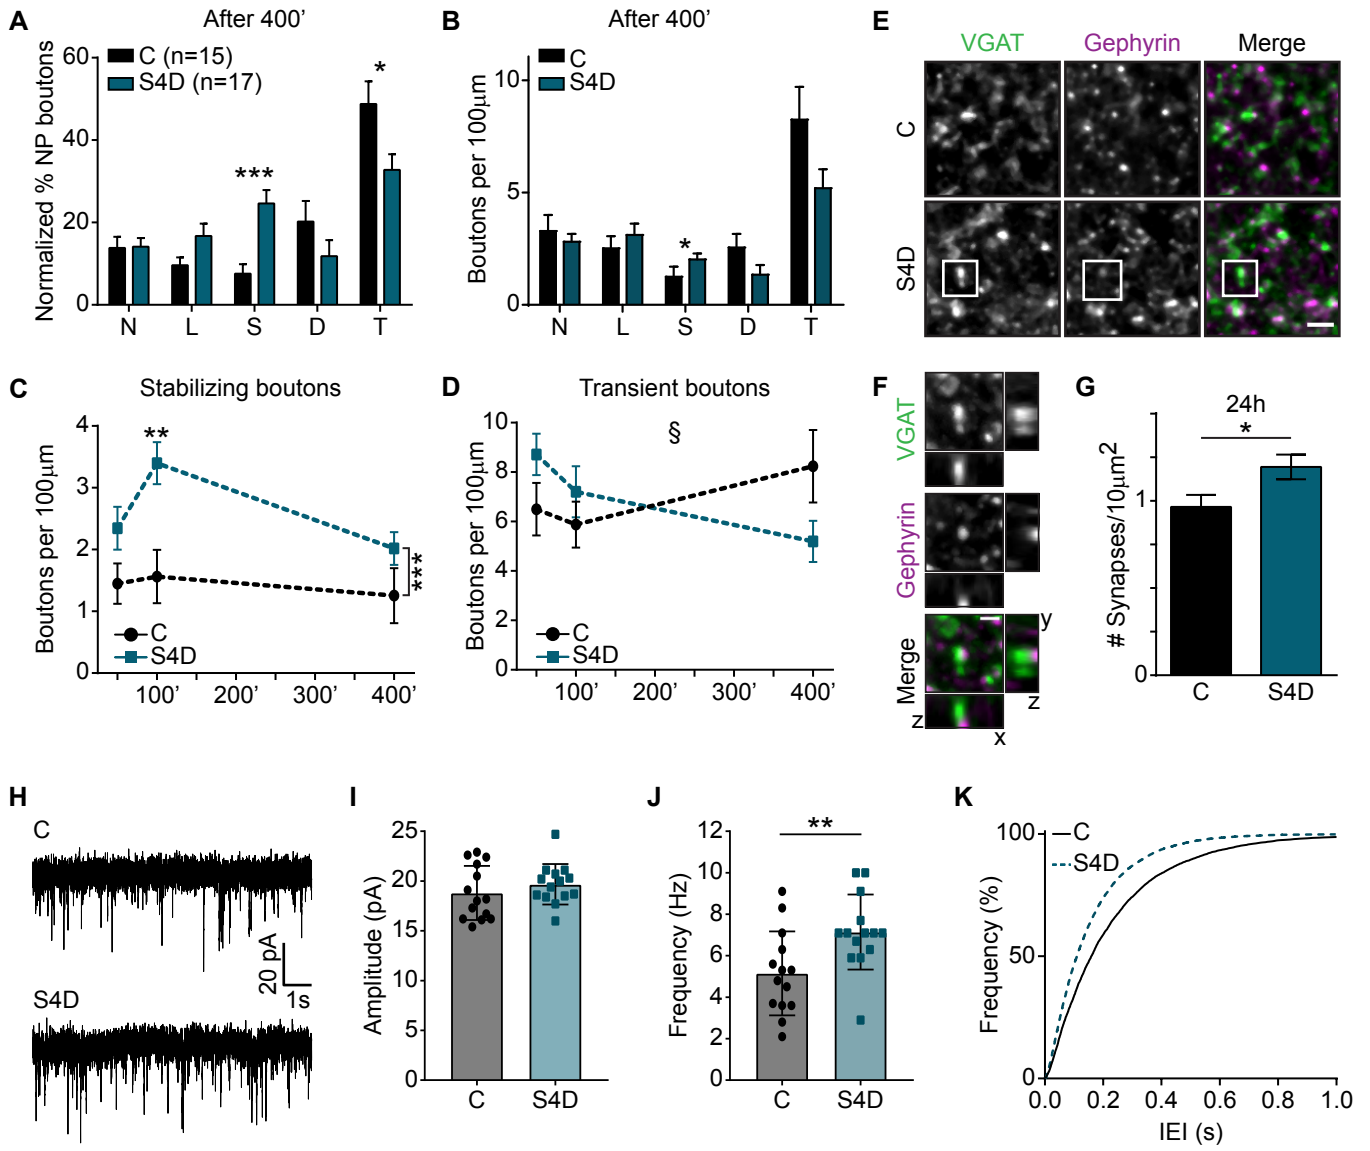

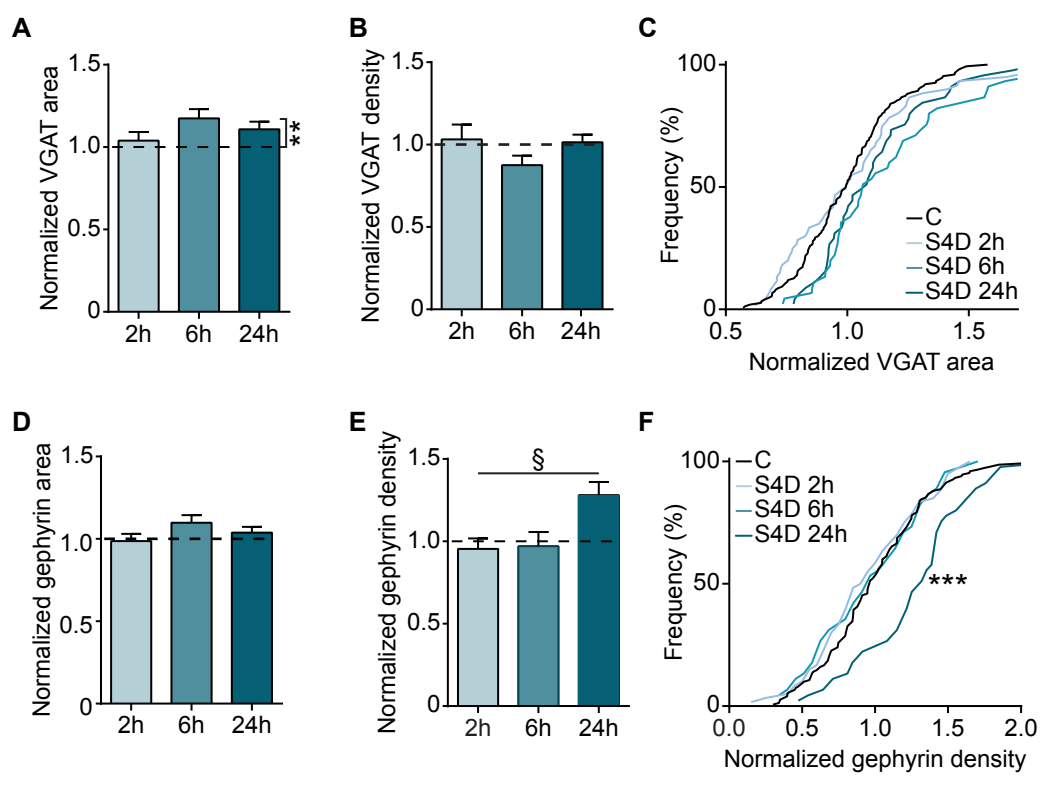

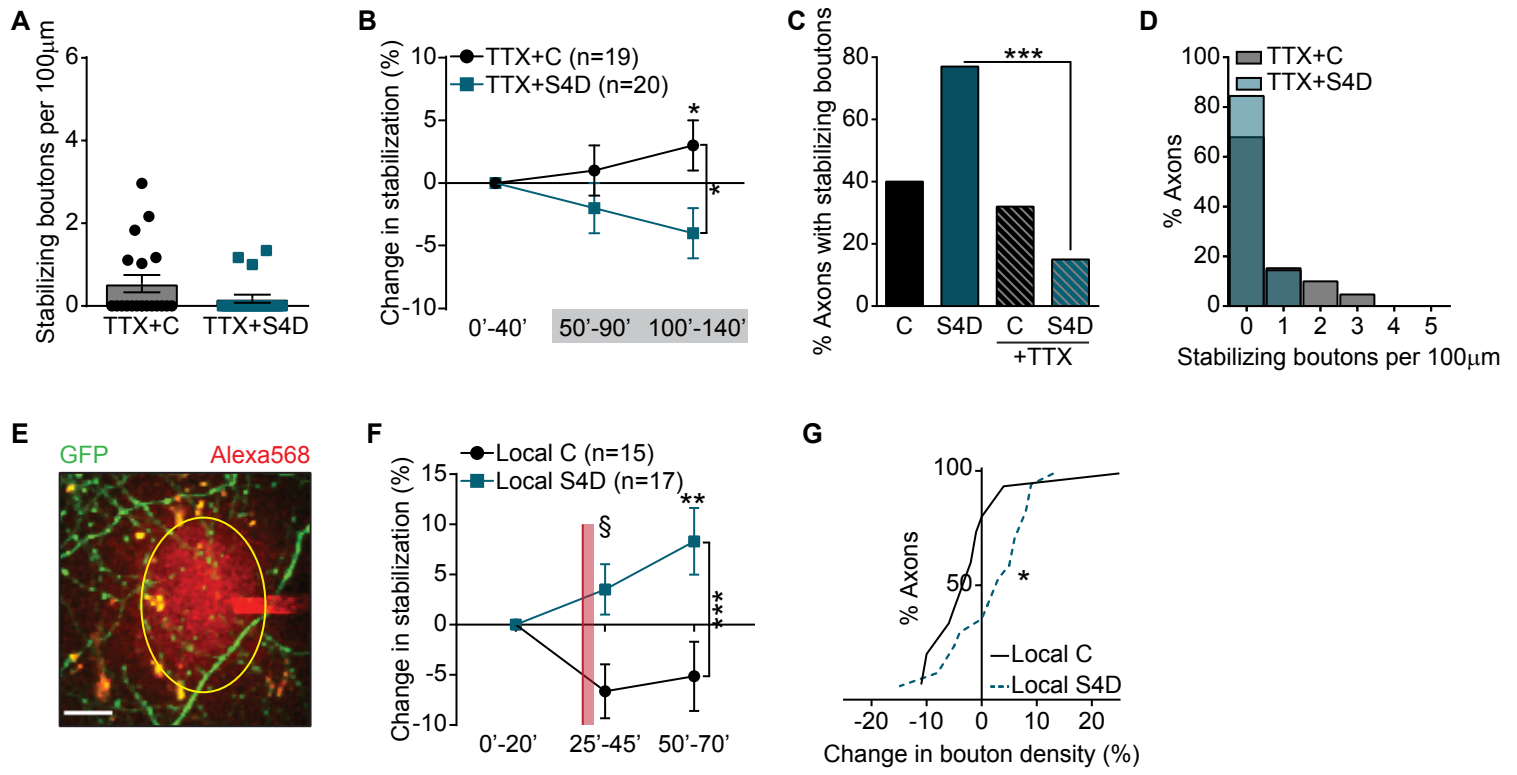

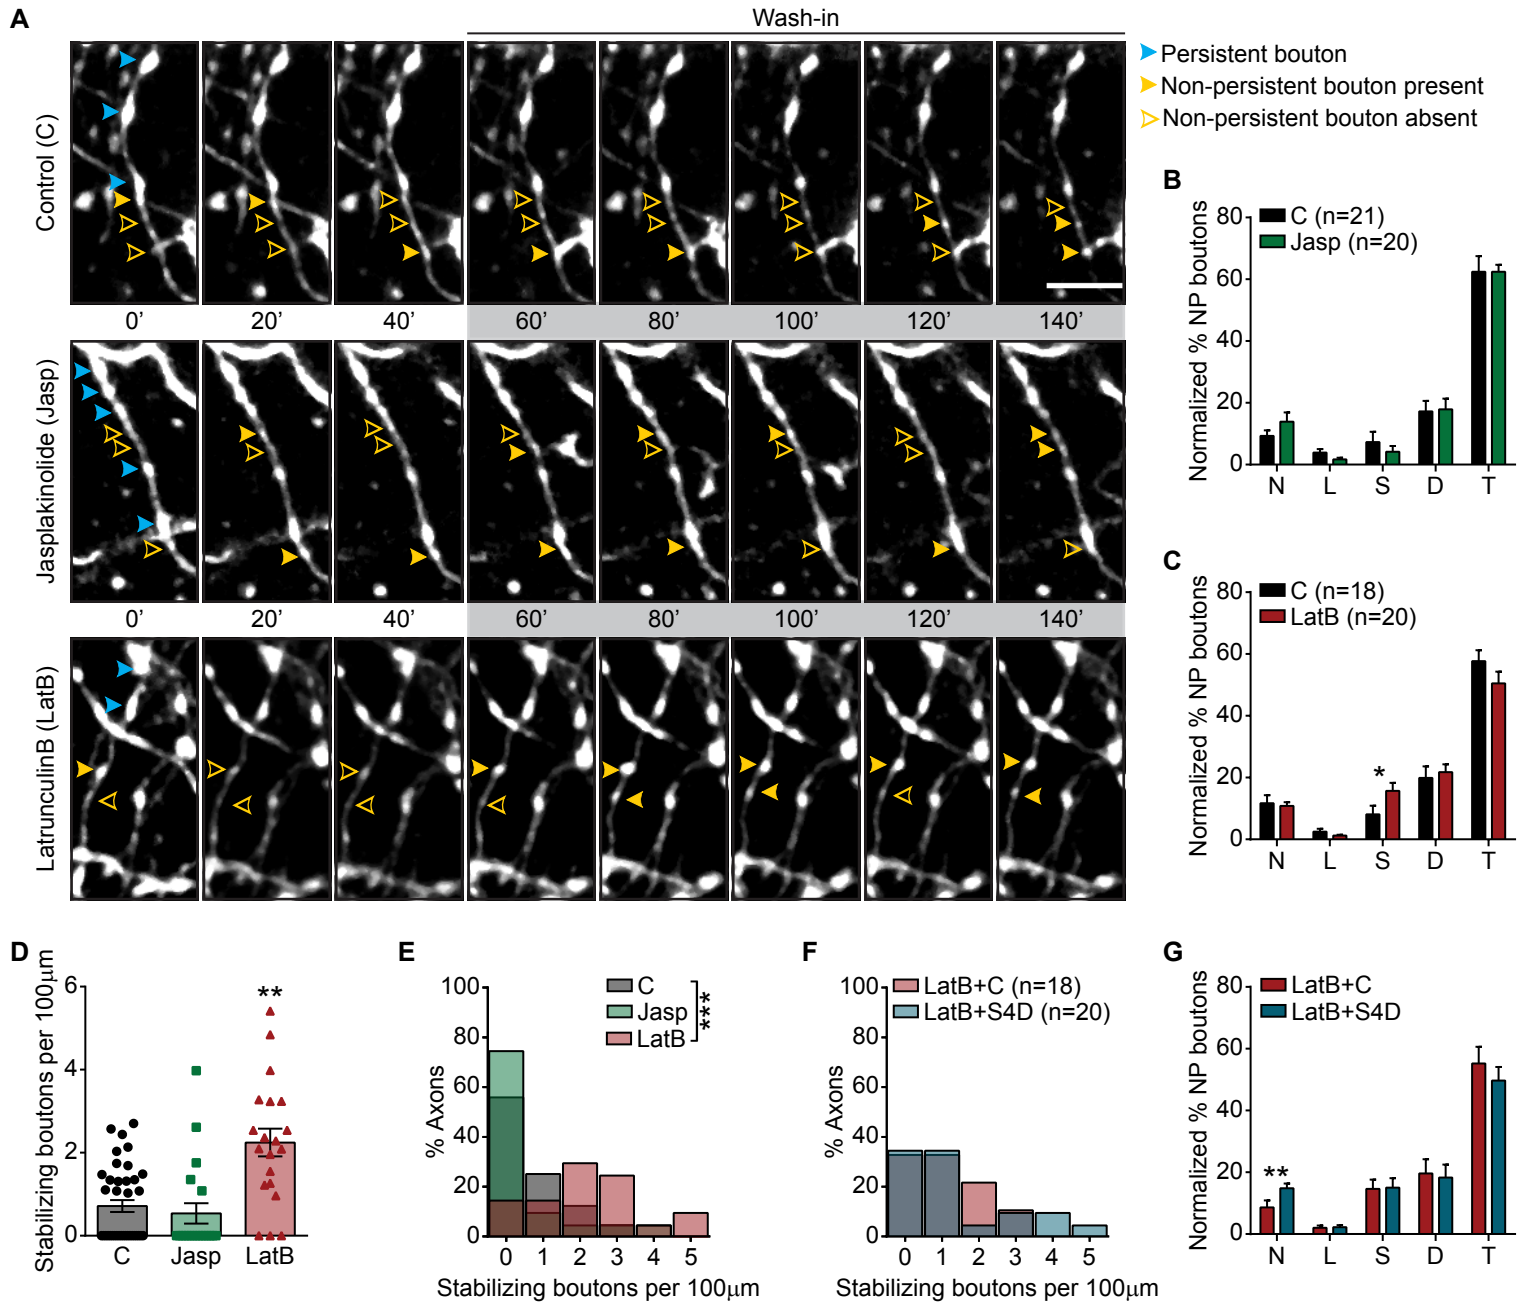

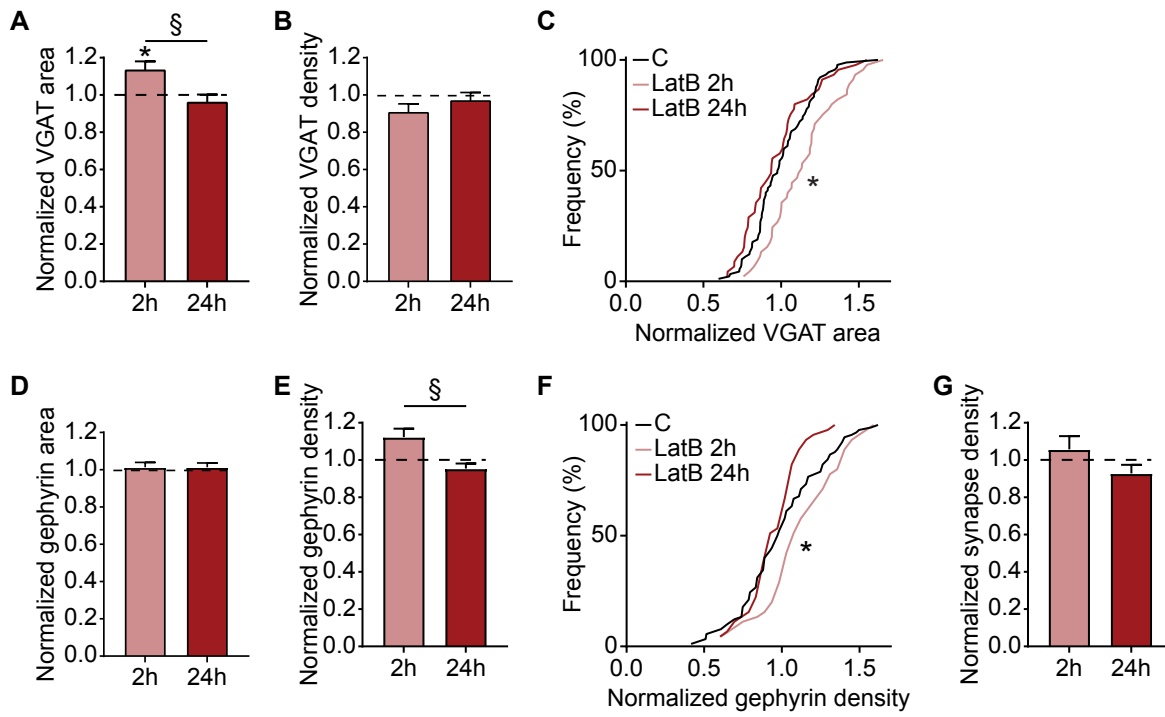



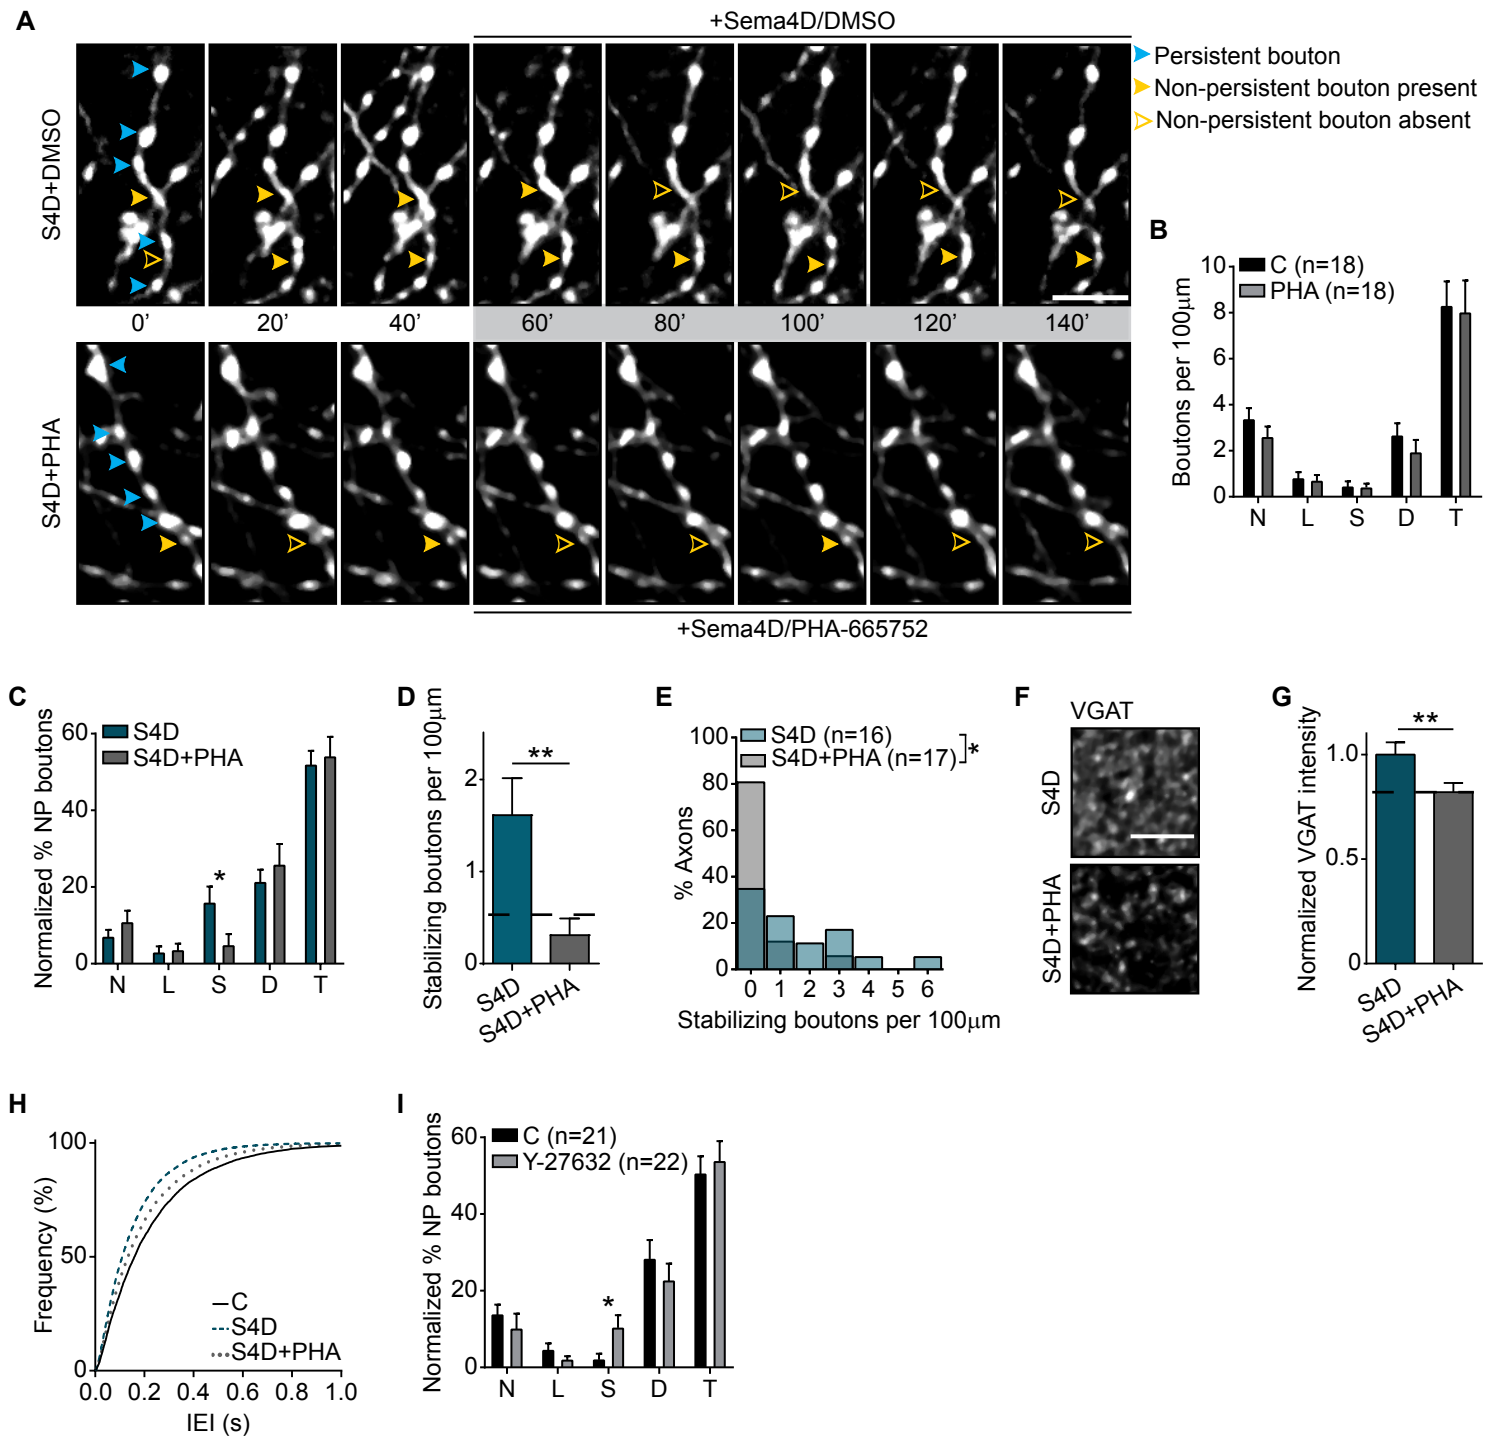

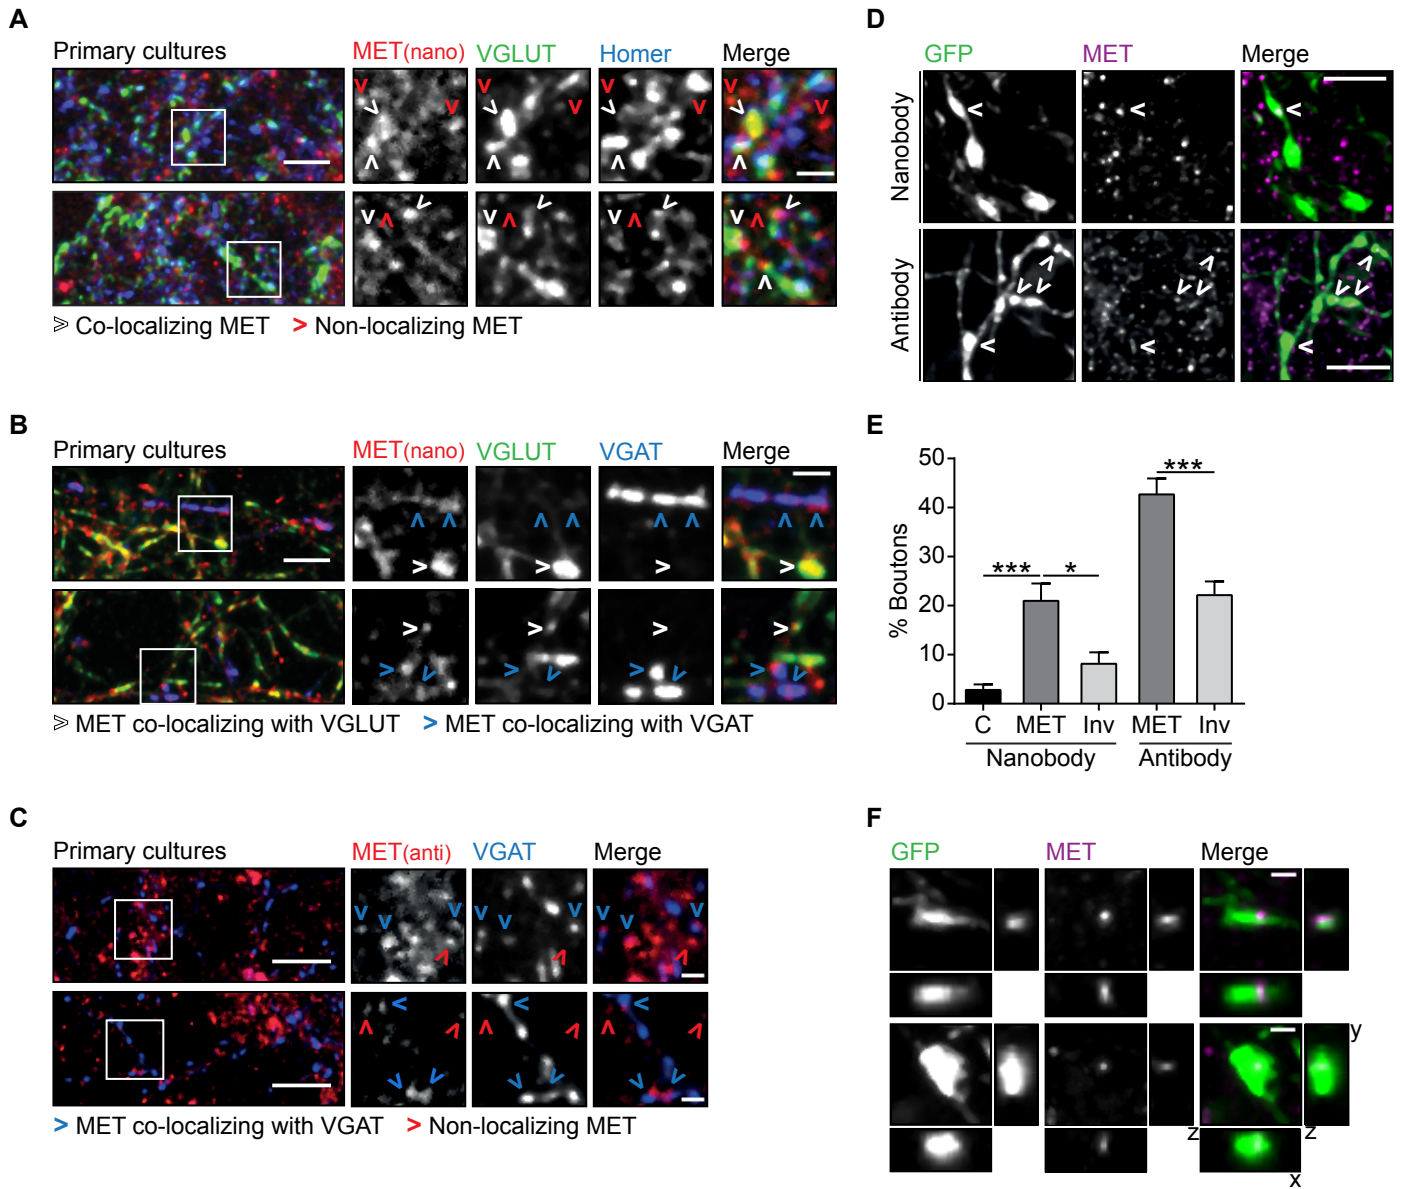

Source: https://www.biorxiv.org/content/biorxiv/early/2018/02/22/100271.full.pdf
